# Supplementary material for: Development of a core outcome set and identification of patient-reportable outcomes for primary brain tumour trials: protocol for the COBra study
Source: PubMed Central journal article supplement (PMC9528585; doi:10.1136/bmjopen-2021-057712), 2022-09-30
Supplement: bmjopen-2021-057712.draft_revisions.pdf [file bmjopen-2021-057712.draft_revisions.pdf]

# BMJ Open

BMJ Open is committed to open peer review. As part of this commitment we make the peer review history of every article we publish publicly available.

When an article is published we post the peer reviewers' comments and the authors' responses online. We also post the versions of the paper that were used during peer review. These are the versions that the peer review comments apply to.

The versions of the paper that follow are the versions that were submitted during the peer review process. They are not the versions of record or the final published versions. They should not be cited or distributed as the published version of this manuscript.

BMJ Open is an open access journal and the full, final, typeset and author-corrected version of record of the manuscript is available on our site with no access controls, subscription charges or pay-per-view fees (<http://bmjopen.bmj.com>).

If you have any questions on BMJ Open's open peer review process please email [info.bmjopen@bmj.com](mailto:info.bmjopen@bmj.com)

# BMJ Open

## Development of a Core Outcome Set and Identification of Patient-Reportable Outcomes for Primary Brain Tumour Trials: Protocol for the COBra Study

|                               |                                                                                                                                                                                                                                                                                                                                                                                                                                                                                                                                                                                                                                                                                                                                                                                                                                                                                                                                                                                                                                                                                                                                                                                                                                                                                                                                                                                                                                                                                                                                                                                                                                                                                                                                                                                                                                                                                                                                                                                                                                                                                                                                                                                                                                                                                                                                                                                                                                                                                                                                          |
|-------------------------------|------------------------------------------------------------------------------------------------------------------------------------------------------------------------------------------------------------------------------------------------------------------------------------------------------------------------------------------------------------------------------------------------------------------------------------------------------------------------------------------------------------------------------------------------------------------------------------------------------------------------------------------------------------------------------------------------------------------------------------------------------------------------------------------------------------------------------------------------------------------------------------------------------------------------------------------------------------------------------------------------------------------------------------------------------------------------------------------------------------------------------------------------------------------------------------------------------------------------------------------------------------------------------------------------------------------------------------------------------------------------------------------------------------------------------------------------------------------------------------------------------------------------------------------------------------------------------------------------------------------------------------------------------------------------------------------------------------------------------------------------------------------------------------------------------------------------------------------------------------------------------------------------------------------------------------------------------------------------------------------------------------------------------------------------------------------------------------------------------------------------------------------------------------------------------------------------------------------------------------------------------------------------------------------------------------------------------------------------------------------------------------------------------------------------------------------------------------------------------------------------------------------------------------------|
| Journal:                      | <i>BMJ Open</i>                                                                                                                                                                                                                                                                                                                                                                                                                                                                                                                                                                                                                                                                                                                                                                                                                                                                                                                                                                                                                                                                                                                                                                                                                                                                                                                                                                                                                                                                                                                                                                                                                                                                                                                                                                                                                                                                                                                                                                                                                                                                                                                                                                                                                                                                                                                                                                                                                                                                                                                          |
| Manuscript ID                 | bmjopen-2021-057712                                                                                                                                                                                                                                                                                                                                                                                                                                                                                                                                                                                                                                                                                                                                                                                                                                                                                                                                                                                                                                                                                                                                                                                                                                                                                                                                                                                                                                                                                                                                                                                                                                                                                                                                                                                                                                                                                                                                                                                                                                                                                                                                                                                                                                                                                                                                                                                                                                                                                                                      |
| Article Type:                 | Protocol                                                                                                                                                                                                                                                                                                                                                                                                                                                                                                                                                                                                                                                                                                                                                                                                                                                                                                                                                                                                                                                                                                                                                                                                                                                                                                                                                                                                                                                                                                                                                                                                                                                                                                                                                                                                                                                                                                                                                                                                                                                                                                                                                                                                                                                                                                                                                                                                                                                                                                                                 |
| Date Submitted by the Author: | 27-Sep-2021                                                                                                                                                                                                                                                                                                                                                                                                                                                                                                                                                                                                                                                                                                                                                                                                                                                                                                                                                                                                                                                                                                                                                                                                                                                                                                                                                                                                                                                                                                                                                                                                                                                                                                                                                                                                                                                                                                                                                                                                                                                                                                                                                                                                                                                                                                                                                                                                                                                                                                                              |
| Complete List of Authors:     | <p>Retzer, Ameeta; University of Birmingham, Centre for Patient Reported Outcomes Research, Institute for Applied Health Research; National Institute for Health Research, Applied Research Centre, West Midlands</p> <p>Sivell, Stephanie; Cardiff University, Marie Curie Palliative Care Research Centre, Division of Population Medicine, Cardiff University School of Medicine, College of Biomedical and Life Sciences</p> <p>Scott, Hannah; University of Cambridge, Cambridge Public Health, University of Cambridge School of Clinical Medicine</p> <p>Nelson, Annmarie; Cardiff University School of Medicine, Marie Curie Palliative Care Research Centre, Division of Population Medicine, Cardiff University School of Medicine, College of Biomedical and Life Sciences</p> <p>Bulbeck, Helen; brainstrust</p> <p>Seddon, Kathy; Cardiff University</p> <p>Grant, Robin ; University of Edinburgh, Centre for Clinical Brain Sciences</p> <p>Adams, Richard; University of Cardiff, Centre for Trials Research</p> <p>Watts, Colin; University of Birmingham, Institute of Cancer and Genomic Sciences, College of Medical and Dental Sciences</p> <p>Aiyegbusi, Olalekan Lee; University of Birmingham, Centre for Patient Reported Outcomes Research, Institute of Applied Health Research; University of Birmingham, NIHR Birmingham Biomedical Research Centre, University of Birmingham and University Hospitals Birmingham NHS Foundation Trust</p> <p>Kearns, Pamela; University of Birmingham, Institute of Cancer and Genomic Sciences, College of Medical and Dental Sciences; University of Birmingham, NIHR Surgical Reconstruction and Microbiology Research Centre</p> <p>Cruz Rivera, Samantha; University of Birmingham, Centre for Patient Reported Outcomes Research, Institute of Applied Health Research; University of Birmingham, Birmingham Health Partners Centre for Regulatory Science and Innovation</p> <p>Dirven, Linda; Leiden University, Department of Neurology, Leiden University Medical Center; Medical Centre Haaglanden, Department of Neurology</p> <p>Baddeley, Elin; Cardiff University, Marie Curie Palliative Care Research Centre, Division of Population Medicine, Cardiff University School of Medicine, College of Biomedical and Life Sciences</p> <p>Calvert , Melanie ; University of Birmingham, Centre for Patient Reported Outcomes Research, Institute of Applied Health Research; National Institute for Health Research, Applied Research Centre West Midlands</p> |

1  
2  
3  
4  
5  
6  
7  
8  
9  
10  
11  
12  
13  
14  
15  
16  
17  
18  
19  
20  
21  
22  
23  
24  
25  
26  
27  
28  
29  
30  
31  
32  
33  
34  
35  
36  
37  
38  
39  
40  
41  
42  
43  
44  
45  
46  
47  
48  
49  
50  
51  
52  
53  
54  
55  
56  
57  
58  
59  
60

|           |                                                                                                                                                                                                  |
|-----------|--------------------------------------------------------------------------------------------------------------------------------------------------------------------------------------------------|
|           | Byrne, Anthony; Cardiff University, Marie Curie Palliative Care Research Centre, Division of Population Medicine, Cardiff University School of Medicine, College of Biomedical and Life Sciences |
| Keywords: | Neurological oncology < NEUROLOGY, Neurological oncology < ONCOLOGY, Adult palliative care < PALLIATIVE CARE, QUALITATIVE RESEARCH, Clinical trials < THERAPEUTICS                               |
|           |                                                                                                                                                                                                  |

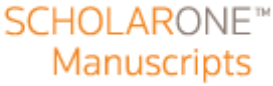

1  
2  
3  
4 **Development of a Core Outcome Set and Identification of Patient-Reportable Outcomes**  
5 **for Primary Brain Tumour Trials: Protocol for the COBra Study**  
6

7 Authors: Ameeta Retzer<sup>1,2,3</sup>, Stephanie Sivell<sup>4</sup>, Hannah Scott<sup>5</sup>, Annmarie Nelson<sup>4</sup>, Helen  
8 Bulbeck<sup>6</sup>, Kathy Seddon<sup>7</sup>, Robin Grant<sup>8</sup>, Richard Adams<sup>9</sup>, Colin Watts<sup>10</sup>, Olalekan Lee  
9 Aiyegbusi<sup>1,2,3,11,12</sup>, Pamela Kearns<sup>10,13</sup>, Samantha Cruz Rivera<sup>1,2,11</sup>, Linda Dirven<sup>15,16</sup>, Elin  
10 Baddeley<sup>4</sup>, Melanie Calvert<sup>1,2,3,11,12,13, 17</sup>, Anthony Byrne<sup>4</sup>  
11

12  
13 <sup>1</sup>Institute of Applied Health Research, University of Birmingham, Birmingham, UK  
14

15 <sup>2</sup>Centre for Patient Reported Outcomes Research, Institute of Applied Health Research,  
16 University of Birmingham, Birmingham, UK  
17

18 <sup>3</sup>National Institute for Health Research (NIHR) Applied Research Centre West Midlands,  
19 Birmingham, UK  
20

21 <sup>4</sup> Marie Curie Palliative Care Research Centre, Division of Population Medicine, Cardiff  
22 University School of Medicine, College of Biomedical and Life Sciences, UK  
23

24 <sup>5</sup> Cambridge Public Health, University of Cambridge School of Clinical Medicine, UK  
25

26 <sup>6</sup> Brainstrust - the brain cancer people, UK  
27

28 <sup>7</sup>Cardiff University, UK  
29

30 <sup>8</sup> University of Edinburgh, UK  
31

32 <sup>9</sup> Centre for Trials Research, Cardiff University, UK  
33

34 <sup>10</sup> Institute of Cancer and Genomic Sciences, College of Medical and Dental Sciences,  
35 University of Birmingham, UK  
36

37 <sup>11</sup>Birmingham Health Partners Centre for Regulatory Science and Innovation, University of  
38 Birmingham, Birmingham, UK  
39

40 <sup>12</sup>NIHR Birmingham Biomedical Research Centre, University of Birmingham, Birmingham, UK  
41

42 <sup>13</sup>NIHR Surgical Reconstruction and Microbiology Research Centre, University of  
43 Birmingham, Birmingham, UK  
44

45 <sup>14</sup> Cancer Research UK Clinical Trials Unit (CRCTU), Institute of Cancer and Genomic Sciences,  
46 University of Birmingham, UK  
47  
48  
49  
50  
51  
52  
53  
54  
55  
56  
57  
58  
59  
60

1  
2  
3 1<sup>5</sup> Department of Neurology, Leiden University Medical Center, Leiden, The Netherlands

4  
5  
6 1<sup>6</sup> Department of Neurology, Haaglanden Medical Center, The Hague, The Netherlands

7  
8 1<sup>7</sup> Midlands Health Data Research UK, Birmingham, UK

9  
10  
11 Correspondence to: Professor Anthony Byrne (anthony.byrne2@wales.nhs.uk)

## 12 13 **Abstract:**

### 14 15 **Introduction**

16 Primary brain tumours, specifically gliomas, are a rare disease group. The disease and  
17 treatment negatively impacts on patients and those close to them. The high rates of physical  
18 and cognitive morbidity differ from other cancers causing reduced health-related quality of  
19 life. Glioma trials using outcomes that allow holistic analysis of treatment benefits and risks  
20 enable informed care decisions. Currently, outcome assessment in glioma trials is  
21 inconsistent, hindering evidence synthesis. A core outcome set (COS): an agreed minimum  
22 set of outcomes to be measured and reported may address this. International initiatives  
23 focus on defining core outcomes assessments across brain tumour types. This paper  
24 presents a protocol for developing a COS for use in glioma trials, applicable across glioma  
25 types involving UK stakeholders, with provision to identify subsets as required. Due to  
26 stakeholder interest in data reported from the patient perspective, outcomes from the COS  
27 that can be patient-reported will be identified.

### 28 29 **Methods and analysis**

30 Stage I: (i) trial registry review to identify outcomes collected in glioma trials and (ii)  
31 systematic review of qualitative literature exploring glioma patient and key stakeholder  
32 research priorities. Stage II: semi-structured interviews with glioma patients and caregivers.  
33 Outcome lists will be generated from Stages I and II. Stage III: study team will remove  
34 duplicate items from the outcome lists and ensure accessible terminology for inclusion in  
35 the Delphi survey. Stage IV: a two-round Delphi process whereby the outcomes will be rated  
36 by key stakeholders. Stage V: a consensus meeting where participants will finalise the COS.  
37 The study team will identify the COS outcomes that can be patient-reported. Further  
38 research is needed to match patient-reported outcomes to available measures.

### 39 40 **Ethics and dissemination**

41 Ethical approval was obtained (REF SMREC 21/59).

### 42 43 **Trial and PROSPERO registration**

44 Core Outcome Measures in Effectiveness Trials ([https://www.comet-  
45 initiative.org/Studies/Details/1793](https://www.comet-initiative.org/Studies/Details/1793)); PROSPERO (CRD42021236979).

### 46 47 **Strengths and Limitations**

- 48 - This study collects original qualitative data to ensure all outcomes prioritised by  
49 glioma patients are identified
  - 50 - Review of trial registries enables comprehensive identification of outcomes used in  
51 trials rather than reliance on often incomplete outcome reporting in trial  
52 publications. However, use of trial registries means those that are not registered will  
53 not be identified
- 54  
55  
56  
57  
58  
59  
60

- Bias may be introduced by inviting qualitative interview participants from Stage II to take part in Delphi; though this encourages familiarity with concepts, enabling meaningful participation in the Delphi
- Qualitative data collected from the UK population may limit international applicability, though this allows exploration of issues that may be specific to UK context and validation of this COS for use in other settings should be explored.

## Introduction:

Primary brain tumours, specifically gliomas, are part of a rare disease group[1]. The disease and its treatment have negative effects on patients and those close to them. The high rates of physical and cognitive morbidity differ from other cancers, with significant impact on a wide range of functional domains. Gliomas are the commonest form of primary brain tumour[2], accounting for 80% of malignant brain tumours. Gliomas represent a heterogeneous group of cancers with variable outcome, traditionally graded from I to IV (least to most aggressive) [2]. However, rapid developments in molecular diagnostics have led to refinements in nomenclature, suggesting a more nuanced approach to brain tumours classification[3]. This would acknowledge the spectrum ranging from a variable but slower-progressing course, such as oligodendroglioma or astrocytoma, to fast-growing tumours such as glioblastoma, a particularly aggressive subtype with a median survival of 12 to 15 months and 5% five year survival rate[4].

The poor prognosis of some glioma patients and the high symptom burden has led to a growing emphasis on their quality of survival[5]. Maintaining cognitive function, physical function and other health-related quality of life aspects throughout the disease trajectory are key considerations alongside very modest survival benefits captured through traditional metrics of tumour response and overall or progression-free survival, particularly for patients with aggressive forms of glioma [6]. Therefore, it is important that glioma intervention studies collect a range of data aligned with patient priorities to enable assessment of the net clinical benefit of treatments [7-10]. These data are known as “outcomes”.

Outcomes include traditional measures such as progression-free survival and radiological tumour response but also Clinical Outcome Assessments (COAs). COAs describe how a patient feels, functions, or survives. COAs include Clinician Reported Outcomes (ClinRO), Observer Reported Outcomes (ObsRO), Performance Outcomes (PerfO), and Patient Reported Outcomes (PROs)[11]. PROs assess a range of outcomes including symptoms, functional health, well-being and psychological issues from the patients’ perspective, without interpretation by a clinician or anyone else [12]. When assessing treatments, PROs enable insight into the impact of treatment on patient’s perceived wellbeing where other outcome data that may indicate minimal differences in disease control and survival, potentially influencing patients’ treatment choices [13].

Interpreting the net clinical benefit of treatments requires effective data synthesis and meta-analyses of trial outcomes. This requires consistent use of outcomes, use of appropriate outcome measures, and diligent data capture, analysis and reporting. Inconsistent outcome use is widespread. A significant lack of standard ontology has been found in cancer clinical trials [14] and in brain tumour studies specifically[15]. Moreover,

selective outcome and missing data reporting is common[16], introducing bias and hindering evidence synthesis. PROs are critical to the comprehensive evaluation of treatment benefits and side effects, and are increasingly used by regulatory authorities. The Food and Drug Administration (FDA) is prioritising a patient-centred approach to drug development[17], a consistent approach to PRO use generally [18], and in cancer clinical trials specifically[19]. The European Medicines Agency (EMA) support PRO use to assess drug efficacy and tolerability in informing product approval in cancer[20], consistent with the FDA[21, 22]. Key PROs for use in cancer has been of consistent interest[19, 23, 24], patients value this form of data [25-28], and it underpins informed shared decision-making [29-32]. However, there is limited consensus on which areas of patient experience should be consistently assessed in brain tumour trials. In cancer trials using PROs, analyses are often unreported in publications and the clinical relevance of PRO results are overlooked [33]. A systematic review of glioma randomised controlled trials (RCTs) using PROs found that only 14% of these trials met the criteria for high quality reporting [34], with PRO results not being interpreted in 79%, and clinical relevance not discussed in 86% of trials.

There are international efforts to unify and improve practice. In PRO research in the field of neuro-oncology, the Response Assessment in Neuro-Oncology Patient Reported Outcomes (RANO-PRO) working group aims to provide guidance on Patient-Reported Outcome Measures (PROMs) in adult neuro-oncology clinical trials and practice (23). Their systematic review (26) found that 215 PROs have been used in brain tumour (primary and secondary) studies, the majority only used once or twice. The FDA and EMA recognise the importance of assessing symptoms, adverse effects and function as core constructs in all glioma trials[35], and have participated in an international multi-stakeholder workshop aiming to define a core set of priority constructs to be assessed as minimum in high grade glioma trials and care[36].

Core Outcome Sets (COS) establish 'the minimum that should be measured and reported in all clinical trials of a specific condition' [37], aiming to achieve consensus between researchers, clinicians, patients and policy makers. This facilitates consistent outcome collection, analysis, and reporting, enables data synthesis and meta-analyses, reduces research waste, and informs patient-centred care. Upon COS confirmation, further research will determine how to measure these outcomes.

The primary aim of this research is to finalise a COS for glioma comprising all outcome types, drawing on the UK perspective. We will define outcomes applicable to all glioma as well those that may be specific to glioma types. The COS will inform interpretation of the net clinical benefit of interventions in terms that reflect stakeholder priorities. Due to interest in core PROs in cancer, our secondary aim is to identify the COS outcomes which can be patient reported.

### **Aims and objectives**

Aims: (1) to develop a COS from a UK perspective for use in adult primary glioma (astrocytoma, oligodendroglioma, oligoastrocytoma, ependymoma, astroblastoma, anaplastic ganglioglioma, glioblastoma, glioblastoma multiforme) phase III interventional trials; (2) identify COS outcomes which can be patient-reported.

### Objectives:

1. Trial registry review to identify glioma trial outcomes and a systematic review of the qualitative literature to explore key stakeholders' research and treatment priorities;
2. Identify outcomes using qualitative interviews with glioma patients and caregivers;
3. Combine the results of Objectives 1 and 2 into a unified longlist of outcomes;
4. Achieve consensus on a COS through online Delphi process and a consensus meeting with a range of stakeholders.

### Research questions:

- Which outcomes are important to patients, caregivers, and other key stakeholders, and what are the perceived gaps in current outcome assessment based on the lived experience of patients and caregivers?
- Can a COS be used across glioma trials or are specific subsets needed?
- Which of the identified outcomes can be patient-reported?
- How does the COS align with and inform the emerging international consensus on outcome assessment across brain tumour types?

### Focus of COS

This COS will apply to phase III interventional trials for systemic anti-cancer treatments (including immunotherapy and chemotherapy), radiotherapy, surgery, and supportive care involving adults (aged over 18 years), diagnosed with glioma, with a specific focus on the UK population. Though some data formulating this COS will be drawn from a UK sample, trialists should consider its applicability internationally. To promote generalisability of results, recruitment into the qualitative interviews and Delphi exercise will be monitored for glioma type, age, ethnicity, and gender.

### Methods

#### Study Design

COBra uses a mixed-methods, multi-stage approach in accordance with accepted COS methodology [38] and guidance[39] (Appendix 1) and registered with the Core Outcome Measures in Effectiveness Trials (COMET) Initiative[40].

#### Ethical Considerations

Ethical approval was granted (REF: SMREC 21/59). All data will be collected and stored in accordance with local regulations[41].

#### Study Team and Collaborators

The study team is multidisciplinary, including Patient and Public Involvement (PPI) representatives, healthcare professionals, researchers, policy makers, and regulators.

Collaboration between The Marie Curie Palliative Care Research Centre Cardiff (MCPCRC), the Centre for Patient Reported Outcomes Research (CPROR), the Centre for Trials Research (Cardiff University) and Birmingham Clinical Trials Unit (CTU) will underpin the methodological approach on behalf of the Supportive and Palliative Care subgroup of the



1  
2  
3 NCRI (National Cancer Research Institute) Brain Tumour group. Collaboration with the  
4 RANO-PRO Initiative[42] working group will ensure alignment with international efforts.  
5  
6

### 7 *Patient and Public Involvement*

8 The PPI team members contributed to study design and will develop and monitor the study  
9 as part of the Steering Group[43], contributing to data analysis and dissemination of study  
10 findings. The study team will seek advice from a wider panel of PPI representatives  
11 convened for the purpose of the study, consisting of individuals with a range of backgrounds  
12 and experiences. The detailed participation of PPI representatives will be reported in  
13 accordance with GRIPP2 [44].  
14  
15  
16  
17

### 18 *Study Summary*

19  
20 There are five study stages:

21 Stage I: focusing on adult glioma, generate an outcome list from:

- 22 (i) Registered glioma trials involving patients aged over 18 years and diagnosed with  
23 primary glioma;
- 24 (ii) Qualitative literature exploring key stakeholder (including patients, caregivers,  
25 healthcare professionals, researchers, policymakers, regulators) research and  
26 treatment priorities.  
27  
28  
29

30 Stage II: Semi-structured interviews with patients with primary glioma and their caregivers,  
31 exploring research and treatment priorities and generate an outcomes list.  
32

33 Stage III: Review of Stage I and II outcome lists by the study team. Duplicates will be  
34 removed and the language will be checked for accessibility.  
35  
36

37 Stage IV: Delphi process with key stakeholder groups to rank the Stage III outcomes list.  
38 Thresholds for outcome inclusion in the COS will be determined *a priori*.  
39  
40

41 Stage V: A consensus meeting with key stakeholders to finalise a COS. Participants will  
42 review and discuss items in disagreement, agree the COS. If appropriate, specific subsets will  
43 be defined and agreed. The study team will identify which of the outcomes could be patient-  
44 reported.  
45  
46

### 47 **Stage I – Evidence review**

#### 48 **Aims**

49 Review of clinical trial registries and a systematic review of published qualitative literature  
50 to generate an outcome list [38] from:  
51  
52

- 53 A) Phase III interventional glioma trials involving adult patients and diagnosed with primary  
54 glioma;
- 55 B) Qualitative studies exploring the lived experience and research priorities of adult  
56 patients with primary glioma, and other key stakeholders.  
57  
58  
59  
60

## Search strategy and data extraction

### *Search A*

ClinicalTrials.gov and ISRCTN clinical trials registries, based in the US and UK respectively, will be used to identify outcomes used in phase III interventional glioma trials in adults (Appendix 2). Data from both are available for public download. Where protocols are available alongside registration information, these will be retrieved.

Two reviewers will independently perform complete searches of glioma trials registered on clinicaltrials.gov and isrctn.com without restriction by date. The results will be independently reviewed for eligibility; disagreements will be resolved with a third reviewer. Two reviewers will independently extract data including basic trial information, year of study, primary outcome(s) and secondary outcomes. Data in the csv files will be cross-referenced with clinical trial registration entry for completeness, and with the protocol when available. The most recently updated of these will be used.

Trials sourced during Search A will be cross-referenced with those retrieved from the RANO-PRO study for information.

### *Search B*

We will systematically review the qualitative literature describing the experiences and needs of adults diagnosed with glioma and thematically synthesise (44) their 'lived experiences' in relation to care, treatment and treatment outcomes.

Databases to be searched include MEDLINE, EMBASE, CINAHL, Web of Science, PsycINFO, the Cochrane Central Register of Controlled Trials and the Cochrane Library. Reference lists of key authors and journals will be hand searched. Qualitative studies, or mixed-method studies containing qualitative data, published in the English language, restricted to 15 years prior, will be included. Research involving adult patients and/or key stakeholders including informal carergivers, will be included. Two reviewers will independently review all titles and abstracts; a third reviewer will review citations for any disagreements. Full text studies will be reviewed by two reviewers; disagreements will be resolved with a third reviewer.

Two reviewers will independently extract data using a standardised data collection form, capturing the themes and sub-themes of the qualitative data pertaining to the lived experience of patients with primary glioma. The qualitative literature will be thematically synthesised following three stages: coding text, developing descriptive themes and generating themes[45]. The data will focus on patients and key stakeholders including informal carergivers, exploring their interpretation of patients' 'lived experiences', including views relating to their attitudes and experience of symptoms and functional outcomes. NVivo[46] will be used for data management.

## **Stage II – Interviews with patients and caregivers**

Semi-structured interviews will be conducted with adults diagnosed with primary glioma across the spectrum of the disease. Interview participants can identify a caregiver to join them in an interview dyad. The interviews will inform the language used in the Delphi survey and identify outcomes not captured during Stage I.

## Aims

The objectives of these interviews are to explore:

- (i) outcomes that are important to patients;
- (ii) caregivers' understanding of patients' priorities and experiences, as these may differ.

## Participant eligibility and sampling

Dyads will comprise eligible patients histologically diagnosed with primary glioma (astrocytoma, oligodendroglioma, oligoastrocytoma, ependymoma, astroblastoma, anaplastic ganglioglioma, glioblastoma, glioblastoma multiforme) and a caregiver identified by the patient. Caregivers are defined as informal carers, who may be a family member or friend, who provides the majority of the support to the patient and is able to estimate the patient's priorities. Patients and caregivers will be over the age of 18 years.

Participants will be recruited through the NCRI Brain Group, the Tessa Jowell BRAIN MATRIX trial platform[47], CTUs, brainstrust – the brain cancer people, The Brain Tumour Charity, snowballing, known contacts, and social media platforms. Potential participants will be invited to contact the research team to express interest. Recruitment will be monitored to promote diversity in terms of glioma type, age, ethnicity, and gender, seeking balance between glioma types. Between 12 and 20 dyads representing the spectrum of malignant disease will be recruited based on previous studies and expected data saturation[48]. Data saturation will be assessed through constant discussion and evaluation of the data by the qualitative researchers conducting the data collection and analysis, together with members of the wider study team. Recruitment will end when data saturation is reached.

## Consent and Capacity

Patients and caregivers will give consent on their own behalf if they wish to participate in an interview. If a patient or caregiver does not proceed with an interview, the other will still be invited to participate. Their permission is not required for the other to participate.

Information sheets will be sent to eligible participants via post or email with the contact details of the research team member conducting the interviews. Participants expressing interest will be given the chance to ask any questions prior to consent. Participants will complete an electronic or hardcopy consent form or will be recorded giving verbal consent, depending on interview format.

In accordance with the Mental Capacity Act (2005), patient participants will be assumed to have capacity unless it is proven otherwise. If there is concern that the patient lacks capacity to participate, this will be discussed with the Chief Investigator, a clinician, about whether further research activity will occur. If research will not continue with the patient participant, the caregiver will be given the opportunity to take part in an interview to share their views.

## Data collection

A semi-structured interview format will be used to understand patient experiences of living with glioma, and what they consider to be the most important outcomes from glioma treatment. Caregiver participants' perspective of patients' experience and priorities will be captured, not a direct report of the patients' condition. The interviews will be undertaken via phone or video link (e.g. Zoom or Microsoft Teams), or face-to-face, depending on the

1  
2  
3 situation and preference of patients. Interviews may take place with patients and caregivers  
4 together or separately, depending on their preference. Interviews where patients and  
5 caregivers are interviewed separately allow for differing views to be expressed. Where  
6 interviews are undertaken together, efforts will be made to ensure both are able to express  
7 their views. Interviews will be audio-recorded. The interview will be guided by open-ended  
8 questions on diagnosis, treatment, and their effects on patients and caregivers, directed  
9 towards understanding outcomes important to patients. The semi-structured format allows  
10 for spontaneous exploration of novel topics. The topic-guide may be reviewed and adapted  
11 iteratively after the first few interviews, if required. At the end of the interviews,  
12 participants will be asked directly which outcomes they believe should be measured in  
13 clinical trials. This places the lived experience of participants at the forefront, with patients  
14 and caregivers given the chance to talk about the things that matter most to them.  
15  
16  
17  
18

### 19 **Data Analysis**

20 The interview data, once transcribed and anonymised, will be thematically analysed [49]  
21 using NVivo software [46] for data management. Thematic analysis allows for the  
22 identification of patterns and themes within the data, to organise and describe data in rich  
23 detail[49]. It is particularly well-suited to studies that focus on lived experience. Data  
24 collected from patients and caregivers will be analysed and formulated into separate  
25 accounts.  
26  
27  
28

29 Analysis of the first three transcripts will be conducted independently by two members of  
30 the research team experienced in qualitative research and a draft coding structure will be  
31 formulated. Disagreements in coding will be resolved through discussion and input from a  
32 third qualitative researcher will be sought when required. The draft coding frame will be  
33 reviewed by PPI team members and a coding structure for the remaining transcripts will be  
34 confirmed. The framework will be refined, until the analysis of all transcripts has been  
35 completed, with the findings synthesised into categories and subcategories.  
36  
37  
38

### 39 **Stage III – Review of outcome list**

40 All outcomes, without limitation by outcome type, captured in Stage I will be grouped and  
41 classified [38]. Each grouping will contain domains and subdomains that broadly measure  
42 particular aspects of the effects of interventions (e.g. symptoms and function)[50]. The  
43 outcome lists formed by each of the two researchers will be compared for completeness,  
44 and differences in the categorisation will be resolved through discussion.  
45  
46

47 The categories and subcategories generated in Stage II will be formulated into an outcome  
48 list and differences in the categorisation will be resolved through discussion.  
49  
50

51 A longlist of outcomes will be generated from the Stage I and II outcome lists. Duplicates  
52 will be removed during this process. This list will be reviewed by the study team to refine  
53 the language used to describe the outcomes. The team will review the structure of the  
54 questions included in the Delphi survey. At this stage, it will be decided whether separate  
55 Delphi processes are needed according to glioma type based on the emerging data.  
56  
57

### 58 **Stage IV – Delphi survey**

1  
2  
3 A modified two-round Delphi will be used to assess the relative importance of outcomes  
4 included in the stage III outcome list. Participants will be invited to consider applicability of  
5 the COS to new and emerging therapies, and whether the outcomes would apply. The aim  
6 of the Delphi process is to reach consensus on which outcomes should form the COS for  
7 glioma trials.  
8  
9

### 10 **Recruitment**

11 Approximately 100 participants with professional or personal experience of glioma care and  
12 treatment: 1) patients, 2) caregivers, 3) healthcare professionals and researchers, 4) policy-  
13 makers and regulators will be recruited as previously described in earlier stages. During  
14 Delphi registration participants will choose the stakeholder group with which they most  
15 identify but can note if they identify with other stakeholder groups besides their primary.  
16 Approximately 25 participants will be recruited to each stakeholder group, recruitment will  
17 be monitored and will inform and direct efforts as required. Consent will be taken  
18 electronically during the online registration process.  
19  
20  
21  
22

### 23 **Delphi process**

24 The Delphi exercise will reflect COMET recommendations [38] and will present the Stage III  
25 outcome list. Participants will rate each of the outcomes on a 9-point Likert scale, (1–3, not  
26 important; 4–6, important but not critical; and 7–9, important and critical)[51]. During  
27 Round 1, participants can add outcomes they feel are missing. Votes from individuals in  
28 each stakeholder group will be given equal weighting. All original outcomes will be  
29 presented in Round 2. Outcomes added by participants in Round 1 will be presented in  
30 Round 2. In Round 2, respondents will be presented with their own rating for each outcome  
31 and how it was rated by their own stakeholder group. Based on this information,  
32 respondents will be invited to amend their score, if they wish. During Round 2, participants  
33 can rate the outcomes suggested in Round 1.  
34  
35  
36

37 The threshold for consensus for inclusion in or exclusion from the COS will be  $\geq 70\%$ ,  
38 informed by those used in comparable COS development studies [52, 53]. After the Delphi,  
39 outcomes will be proposed for inclusion in the final COS if  $\geq 70\%$  respondents rate the item  
40 as 7-9 and  $\leq 15\%$  rate the item as 1-3. Items will be proposed for exclusion from the final  
41 COS if  $\geq 70\%$  respondents rate the item as 1-3 and  $\leq 15\%$  rate the item as 7-9. Those  
42 outcomes that do not reach agreement after the two Delphi rounds will be discussed in the  
43 consensus meeting, together with the items proposed for inclusion and exclusion.  
44  
45  
46

### 47 **Missing data**

48 To minimise partial response, participants will be unable to skip questions but can indicate  
49 when they feel unable to rank specific items. Reminders will be used to minimise participant  
50 attrition between Delphi rounds. Use of specialised Delphi software, Delphi Manager, will  
51 enable rapid inter-round rating calculations to allow the second round to open with minimal  
52 delay to further reduce attrition.  
53  
54  
55  
56

### 57 **Stage V consensus meeting**

58 This meeting may be held virtually or in person, depending on the situation and preference  
59 of the majority of participants. All Delphi participants will be invited. Notes will be taken  
60

1  
2  
3 during the meeting and consent will be sought from all participants to audio-record the  
4 meeting for reference. Decisions made during the consensus meeting will be made through  
5 anonymous voting using voting software. Decisions will proceed if ratified by  $\geq 70\%$  of the  
6 group. In cases where there is  $< 100\%$  consensus, decisions will be discussed until those in  
7 disagreement are satisfied that their views have been considered and that the decision can  
8 proceed. The core outcomes applicable to all glioma trials will be agreed, as will any  
9 outcomes identified as specific to particular types of glioma. Following the consensus  
10 meeting, the study team will identify which of the outcomes could be assessed by patient  
11 reporting.  
12  
13  
14  
15  
16

### 17 **Dissemination**

18 The final COS will be published in compliance with accepted reporting standards [38] and  
19 adopted and promoted by the NCRI Brain Clinical Studies Group Supportive and Palliative  
20 Care subgroup for use in glioma studies. The subgroup will publish a position statement  
21 mandating for UK CTUs involved in brain tumour research to implement the COS.  
22 Study findings will be disseminated widely, including to national and international  
23 conferences and high-impact journals. A plain English summary will be co-produced with PPI  
24 team members and made available to participants upon request. The COS will be promoted  
25 amongst patient and carer groups using The Brain Tumour Charity network (including  
26 BRIAN), NCRI and regional PPI frameworks, brainstrust, and other patient organisations. The  
27 importance of COS development is increasingly recognised by funders, such as the National  
28 Institute for Health Research, and regulators, such as EMA and FDA. The COS will therefore  
29 be promoted to encourage its inclusion in 'justification of outcomes' sections of funding  
30 proposals and regulatory submissions. The final COS will be freely available on the COMET  
31 database.  
32  
33  
34  
35

36 Though some data used to develop this COS will be drawn from a UK perspective, its  
37 applicability internationally should be explored. The study team will consider the findings of  
38 this study in the context of existing international initiatives. Findings will be shared with  
39 international partners and may be integrated into international guidance on outcome  
40 assessment across all brain tumour types.  
41

42 COBra will directly collaborate with the RANO-PRO working group and affiliated  
43 international initiatives to share the UK perspective. Following study completion, RANO-PRO  
44 findings may be used to select appropriate COAs aligned to the COS. COBra will also  
45 collaborate with UK funders, trialists and CTUs on COS implementation and the consistent  
46 application of international standards for collection, analysis and reporting of the COS  
47 across all UK studies.  
48  
49

### 50 **Funding**

51 This study is funded by The Brain Tumour Charity (GN-000704). The funders have no role in  
52 study design or manuscript preparation.  
53  
54

### 55 **Competing interests**

56 Due to their involvement in the study design, the study team members will not participate in the  
57 Delphi process or consensus meeting, other than in a facilitative role. Study team members will  
58  
59  
60

1  
2  
3 encourage engagement and participation in the Delphi process and consensus meeting by  
4 individuals within the networks of which they are part, as appropriate.  
5  
6  
7  
8

### 9 **Author contribution**

10 The study concept and design was conceived by AR, SS, HS, AN, HB, KS, RG, RA, CW, OLA, PK,  
11 SCR, LD, EB, MC, and AB. MC and AR advised on methodology. EB and AR will undertake the  
12 registry review, EB and SS will undertake the qualitative systematic review. EB and SS will  
13 recruit, screen and consent participants and will undertake the interviews with input from  
14 AR and AB. EB will recruit for the Delphi and consensus meeting, with input from SS, AR, and  
15 AB. HS prepared the first draft of the manuscript. AR prepared subsequent drafts. SS, HS,  
16 AN, HB, KS, RG, RA, CW, OLA, PK, SCR, LD, EB, MC, and AB all provided edits and critiqued  
17 the manuscript for intellectual content.  
18  
19  
20  
21  
22  
23

### 24 **References**

- 25
- 26 1. Diseases, N.O.f.R. *Glioma*. 2019 [cited 2021 21 September].
- 27 2. Goodenberger, M.L. and R.B. Jenkins, *Genetics of adult glioma*. *Cancer Genet*, 2012. **205**(12):  
28 p. 613-21.
- 29 3. Wood, M.D., A.M. Halfpenny, and S.R. Moore, *Applications of molecular neuro-oncology - a*  
30 *review of diffuse glioma integrated diagnosis and emerging molecular entities*. *Diagnostic*  
31 *Pathology*, 2019. **14**(1): p. 29.
- 32 4. UK, C.R. *Survival*. 2019 [cited 2021 1 June].
- 33 5. Sagberg, L.M., O. Solheim, and A.S. Jakola, *Quality of survival the 1st year with glioblastoma:*  
34 *a longitudinal study of patient-reported quality of life*. *Journal of Neurosurgery JNS*, 2016.  
35 **124**(4): p. 989-997.
- 36 6. Basch, E., et al., *Patient-Reported Outcomes in Cancer Drug Development and US Regulatory*  
37 *Review: Perspectives From Industry, the Food and Drug Administration, and the Patient*.  
38 *JAMA Oncol*, 2015. **1**(3): p. 375-9.
- 39 7. MacDonald, L.o.b.o.t.N.-O.G. *Top 10 priorities for clinical research in primary brain and spinal*  
40 *cord tumours: final report of the James Lind Alliance Priority Setting Partnership in Neuro-*  
41 *Oncology*. 2015 28 January 2021].
- 42 8. Collins, A., et al., *The challenges and suffering of caring for people with primary malignant*  
43 *glioma: qualitative perspectives on improving current supportive and palliative care*  
44 *practices*. *BMJ Support Palliat Care*, 2014. **4**(1): p. 68-76.
- 45 9. Piil, K., et al., *Controlled rehabilitative and supportive care intervention trials in patients with*  
46 *high-grade gliomas and their caregivers: a systematic review*. *BMJ Support Palliat Care*,  
47 2016. **6**(1): p. 27-34.
- 48 10. Armstrong, T.S. and M.R. Gilbert, *Net clinical benefit: functional endpoints in brain tumor*  
49 *clinical trials*. *Curr Oncol Rep*, 2007. **9**(1): p. 60-5.
- 50 11. Administration, U.F.a.D. *Clinical Outcome Assessment (COA) Qualification Program*. 2021  
51 [cited 2021 1 June].
- 52 12. FDA. *Guidance for industry: Patient-Reported outcome measures: Use in medical product*  
53 *development to support labeling claims*. 2009 [cited 2021 2 June].
- 54 13. Fairclough, D.L., *Patient reported outcomes as endpoints in medical research*. *Statistical*  
55 *Methods in Medical Research*, 2004. **13**(2): p. 115-138.  
56  
57  
58  
59  
60

14. Hirsch, B.R., et al., *Characteristics of oncology clinical trials: insights from a systematic analysis of ClinicalTrials.gov*. JAMA Intern Med, 2013. **173**(11): p. 972-9.
15. Dirven, L., et al., *Systematic review on the use of patient-reported outcome measures in brain tumor studies: part of the Response Assessment in Neuro-Oncology Patient-Reported Outcome (RANO-PRO) initiative*. Neuro-Oncology Practice, 2021.
16. Kirkham, J.J., et al., *Can a core outcome set improve the quality of systematic reviews?--a survey of the Co-ordinating Editors of Cochrane Review Groups*. Trials, 2013. **14**: p. 21.
17. Administration, F.a.D. *FDA Patient-Focused Drug Development Guidance Series for Enhancing the Incorporation of the Patient's Voice in Medical Product Development and Regulatory Decision Making*. 2020 [cited 2021 3 August].
18. *Guidance for industry: patient-reported outcome measures: use in medical product development to support labeling claims: draft guidance*. Health Qual Life Outcomes, 2006. **4**: p. 79.
19. Administration, F.a.D. *Core Patient-Reported Outcomes in Cancer Clinical Trials: Draft Guidance for Industry*. 2021 [cited 2021 3 August].
20. Agency, E.M. *Appendix 2 to the guideline on the evaluation of anticancer medicinal products in man : The use of patient-reported outcome (PRO) measures in oncology studies*. 2016 [cited 2021 3 August].
21. Basch, E. and C. Yap, *Patient-Reported Outcomes for Tolerability Assessment in Phase I Cancer Clinical Trials*. JNCI: Journal of the National Cancer Institute, 2021. **113**(8): p. 943-944.
22. Kluetz, P.G., et al., *Informing the Tolerability of Cancer Treatments Using Patient-Reported Outcome Measures: Summary of an FDA and Critical Path Institute Workshop*. Value Health, 2018. **21**(6): p. 742-747.
23. Reeve, B.B., et al., *Recommended Patient-Reported Core Set of Symptoms to Measure in Adult Cancer Treatment Trials*. JNCI: Journal of the National Cancer Institute, 2014. **106**(7).
24. Kluetz, P.G., et al., *Focusing on Core Patient-Reported Outcomes in Cancer Clinical Trials: Symptomatic Adverse Events, Physical Function, and Disease-Related Symptoms*. Clin Cancer Res, 2016. **22**(7): p. 1553-8.
25. Calvert, M.J. and N. Freemantle, *Use of health-related quality of life in prescribing research. Part 1: why evaluate health-related quality of life?* J Clin Pharm Ther, 2003. **28**(6): p. 513-21.
26. Ouwens, M., et al., *Development of indicators for patient-centred cancer care*. Support Care Cancer, 2010. **18**(1): p. 121-30.
27. Brundage, M., et al., *Cancer patients' preferences for communicating clinical trial quality of life information: a qualitative study*. Qual Life Res, 2003. **12**(4): p. 395-404.
28. Davison, B.J., et al., *Provision of individualized information to men and their partners to facilitate treatment decision making in prostate cancer*. Oncol Nurs Forum, 2003. **30**(1): p. 107-14.
29. England, N. *Shared decision making*. 2021 [cited 2021 1 June].
30. Excellence, N.I.f.H.a.C. *Shared decision making*. 2021 [cited 2021 1 June].
31. Au, H.J., et al., *Added value of health-related quality of life measurement in cancer clinical trials: the experience of the NCIC CTG*. Expert Rev Pharmacoecon Outcomes Res, 2010. **10**(2): p. 119-28.
32. Basch, E., *Toward patient-centered drug development in oncology*. N Engl J Med, 2013. **369**(5): p. 397-400.
33. Pe, M., et al., *Statistical analysis of patient-reported outcome data in randomised controlled trials of locally advanced and metastatic breast cancer: a systematic review*. Lancet Oncol, 2018. **19**(9): p. e459-e469.
34. Dirven, L., et al., *The level of patient-reported outcome reporting in randomised controlled trials of brain tumour patients: a systematic review*. Eur J Cancer, 2014. **50**(14): p. 2432-48.



- 1
  - 2
  - 3
  - 4
  - 5
  - 6
  - 7
  - 8
  - 9
  - 10
  - 11
  - 12
  - 13
  - 14
  - 15
  - 16
  - 17
  - 18
  - 19
  - 20
  - 21
  - 22
  - 23
  - 24
  - 25
  - 26
  - 27
  - 28
  - 29
  - 30
  - 31
  - 32
  - 33
  - 34
  - 35
  - 36
  - 37
  - 38
  - 39
  - 40
  - 41
  - 42
  - 43
  - 44
  - 45
  - 46
  - 47
  - 48
  - 49
  - 50
  - 51
  - 52
  - 53
  - 54
  - 55
  - 56
  - 57
  - 58
  - 59
  - 60
35. Armstrong, T.S., et al., *Glioma patient-reported outcome assessment in clinical care and research: a Response Assessment in Neuro-Oncology collaborative report*. The Lancet Oncology, 2020. **21**(2): p. e97-e103.
36. Helfer, J.L., et al., *Report of the Jumpstarting Brain Tumor Drug Development Coalition and FDA clinical trials clinical outcome assessment endpoints workshop (October 15, 2014, Bethesda MD)*. Neuro-oncology, 2016. **18 Suppl 2**(Suppl 2): p. ii26-ii36.
37. Kirkham, J.J., et al., *Core Outcome Set-STANDards for Development: The COS-STAD recommendations*. PLoS Med, 2017. **14**(11): p. e1002447.
38. Williamson, P.R., et al., *The COMET Handbook: version 1.0*. Trials, 2017. **18**(Suppl 3): p. 280.
39. Kirkham, J.J., et al., *Core Outcome Set-STANDARDISED Protocol Items: the COS-STAP Statement*. Trials, 2019. **20**(1): p. 116.
40. Byrne A, S.S., Scott H, Nelson A, Seddon K, Calvert M, Retzer A, Grant R, Bulbeck H, Adams R, Watts C, Aiyegbusi OL, Kearns P, Cruz Rivera S. *Patient Reported Core Outcomes in Brain Tumour Trials: the COBra study*. 2020 [cited 2021 5 August].
41. Department for Digital, C., Media & Sport, Home Office. *Data Protection Act 2018*. 2018 [cited 2021 1 February].
42. Dirven, L., et al., *Working plan for the use of patient-reported outcome measures in adults with brain tumours: a Response Assessment in Neuro-Oncology (RANO) initiative*. Lancet Oncol, 2018. **19**(3): p. e173-e180.
43. INVOLVE. *UK Standards for Public Involvement: Better public involvement for better health and social care*. 2019 [cited 2021 4 August].
44. Staniszewska, S., et al., *GRIPP2 reporting checklists: tools to improve reporting of patient and public involvement in research*. Bmj, 2017. **358**: p. j3453.
45. Thomas, J. and A. Harden, *Methods for the thematic synthesis of qualitative research in systematic reviews*. BMC Med Res Methodol, 2008. **8**: p. 45.
46. Ltd, Q.I.P. *NVivo qualitative data analysis software*. 2020 [cited 2021 1 June].
47. Birmingham, U.o. *Tessa Jowell BRAIN MATRIX*. 2020 [cited 2021 5 August].
48. Saunders, B., et al., *Saturation in qualitative research: exploring its conceptualization and operationalization*. Qual Quant, 2018. **52**(4): p. 1893-1907.
49. Braun, V. and V. Clarke, *Using thematic analysis in psychology*. Qualitative Research in Psychology, 2006. **3**(2): p. 77-101.
50. Health, N.I.o. *Patient-Reported Outcomes Measurement Information System—PROMIS*. 2019 [cited 2021 29 January].
51. Guyatt, G.H., et al., *GRADE guidelines: 2. Framing the question and deciding on important outcomes*. J Clin Epidemiol, 2011. **64**(4): p. 395-400.
52. Waters, A.M., et al., *The CONSENSUS study: protocol for a mixed methods study to establish which outcomes should be included in a core outcome set for oropharyngeal cancer*. Trials, 2014. **15**: p. 168.
53. Fish, R., et al., *Core outcome research measures in anal cancer (CORMAC): protocol for systematic review, qualitative interviews and Delphi survey to develop a core outcome set in anal cancer*. BMJ Open, 2017. **7**(11): p. e018726.

## Appendix 1

|                                                               |                                                                                                                                                                                                                                                                                       | Page     |
|---------------------------------------------------------------|---------------------------------------------------------------------------------------------------------------------------------------------------------------------------------------------------------------------------------------------------------------------------------------|----------|
| Title 1a                                                      | Identify in the title that the paper describes the protocol for the planned development of a COS                                                                                                                                                                                      | 1        |
| Abstract 1b                                                   | Provide a structured abstract                                                                                                                                                                                                                                                         | 2        |
| INTRODUCTION Background and objectives 2a                     | Describe the background and explain the rationale for developing the COS, and identify the reasons why a COS is needed and the potential barriers to its implementation                                                                                                               | 3,4      |
| 2b                                                            | Describe the specific objectives with reference to developing a COS                                                                                                                                                                                                                   | 5        |
| Scope 3a                                                      | Describe the health condition(s) and population(s) that will be covered by the COS                                                                                                                                                                                                    | 5        |
| 3b                                                            | Describe the intervention(s) that will be covered by the COS                                                                                                                                                                                                                          | 5        |
| 3c                                                            | Describe the context of use for which the COS is to be applied                                                                                                                                                                                                                        | 5        |
| METHODS Stakeholders 4                                        | Describe the stakeholder groups to be involved in the COS development process, the nature of and rationale for their involvement and also how the individuals will be identified; this should cover involvement both as members of the research team and as participants in the study | 6-10     |
| Information sources 5a                                        | Describe the information sources that will be used to identify the list of outcomes. Outline the methods or reference other protocols/papers                                                                                                                                          | 6-8      |
| 5b                                                            | Describe how outcomes may be dropped/ combined, with reasons                                                                                                                                                                                                                          | 9-11     |
| Consensus process 6                                           | Describe the plans for how the consensus process will be undertaken                                                                                                                                                                                                                   | 10-11    |
| Consensus definition 7a                                       | Describe the consensus definition                                                                                                                                                                                                                                                     | 10-11    |
| 7b                                                            | Describe the procedure for determining how outcomes will be added/combined/dropped from consideration during the consensus process                                                                                                                                                    | 10-11    |
| ANALYSIS Outcome scoring/ feedback 8                          | Describe how outcomes will be scored and summarised, describe how participants will receive feedback during the consensus process                                                                                                                                                     | 10-11    |
| Missing data 9                                                | Describe how missing data will be handled during the consensus process                                                                                                                                                                                                                | 10       |
| ETHICS and DISSEMINATION Ethics approval/ informed consent 10 | Describe any plans for obtaining research ethics committee/institutional review board approval in relation to the consensus process and describe how informed consent will be obtained (if relevant)                                                                                  | 5, 8, 10 |
| Dissemination 11                                              | Describe any plans to communicate the results to study participants and COS users, inclusive of methods and timing of dissemination                                                                                                                                                   | 11       |
| ADMINISTRATIVE INFORMATION Funders 12                         | Describe sources of funding, role of funders                                                                                                                                                                                                                                          | 11       |
| Conflicts of interest 13                                      | Describe any potential conflicts of interest within the study team and how they will be managed                                                                                                                                                                                       | 11       |

1  
2  
3  
4  
5  
6  
7  
8  
9  
10  
11  
12  
13  
14  
15  
16  
17  
18  
19  
20  
21  
22  
23  
24  
25  
26  
27  
28  
29  
30  
31  
32  
33  
34  
35  
36  
37  
38  
39  
40  
41  
42  
43  
44  
45  
46  
47  
48  
49  
50  
51  
52  
53  
54  
55  
56  
57  
58  
59  
60

For peer review only

1  
2  
3 Appendix 2  
4  
5

6 1. ClinicalTrials.gov

7 Condition/Disease: glioma OR astrocytoma OR oligodendroglioma OR oligoastrocytoma OR  
8 ependymoma OR astroblastoma OR anaplastic ganglioglioma OR glioblastoma OR GBM OR  
9 Glioblastoma multiforme

10 Study type: Interventional Studies (Clinical Trials)

11 Age: Adult 18-64 AND Older Adult (65+)

12 Phase: III  
13  
14

15 2. ISRCTN.com

16 Each term searched individually:

17 Condition/Disease: glioma; astrocytoma; oligodendroglioma; oligoastrocytoma;  
18 ependymoma; astroblastoma; anaplastic ganglioglioma; glioblastoma; GBM; Glioblastoma  
19 multiforme  
20  
21  
22  
23  
24  
25  
26  
27  
28  
29  
30  
31  
32  
33  
34  
35  
36  
37  
38  
39  
40  
41  
42  
43  
44  
45  
46  
47  
48  
49  
50  
51  
52  
53  
54  
55  
56  
57  
58  
59  
60

# BMJ Open

## Development of a Core Outcome Set and Identification of Patient-Reportable Outcomes for Primary Brain Tumour Trials: Protocol for the COBra Study

|                               |                                                                                                                                                                                                                                                                                                                                                                                                                                                                                                                                                                                                                                                                                                                                                                                                                                                                                                                                                                                                                                                                                                                                                                                                                                                                                                                                                                                                                                                                                                                                                                                                                                                                                                                                                                                                                                                                                                                                                                                                                                                                                                                                                                                                                                                                                                                                                                                                                                                                         |
|-------------------------------|-------------------------------------------------------------------------------------------------------------------------------------------------------------------------------------------------------------------------------------------------------------------------------------------------------------------------------------------------------------------------------------------------------------------------------------------------------------------------------------------------------------------------------------------------------------------------------------------------------------------------------------------------------------------------------------------------------------------------------------------------------------------------------------------------------------------------------------------------------------------------------------------------------------------------------------------------------------------------------------------------------------------------------------------------------------------------------------------------------------------------------------------------------------------------------------------------------------------------------------------------------------------------------------------------------------------------------------------------------------------------------------------------------------------------------------------------------------------------------------------------------------------------------------------------------------------------------------------------------------------------------------------------------------------------------------------------------------------------------------------------------------------------------------------------------------------------------------------------------------------------------------------------------------------------------------------------------------------------------------------------------------------------------------------------------------------------------------------------------------------------------------------------------------------------------------------------------------------------------------------------------------------------------------------------------------------------------------------------------------------------------------------------------------------------------------------------------------------------|
| Journal:                      | <i>BMJ Open</i>                                                                                                                                                                                                                                                                                                                                                                                                                                                                                                                                                                                                                                                                                                                                                                                                                                                                                                                                                                                                                                                                                                                                                                                                                                                                                                                                                                                                                                                                                                                                                                                                                                                                                                                                                                                                                                                                                                                                                                                                                                                                                                                                                                                                                                                                                                                                                                                                                                                         |
| Manuscript ID                 | bmjopen-2021-057712.R1                                                                                                                                                                                                                                                                                                                                                                                                                                                                                                                                                                                                                                                                                                                                                                                                                                                                                                                                                                                                                                                                                                                                                                                                                                                                                                                                                                                                                                                                                                                                                                                                                                                                                                                                                                                                                                                                                                                                                                                                                                                                                                                                                                                                                                                                                                                                                                                                                                                  |
| Article Type:                 | Protocol                                                                                                                                                                                                                                                                                                                                                                                                                                                                                                                                                                                                                                                                                                                                                                                                                                                                                                                                                                                                                                                                                                                                                                                                                                                                                                                                                                                                                                                                                                                                                                                                                                                                                                                                                                                                                                                                                                                                                                                                                                                                                                                                                                                                                                                                                                                                                                                                                                                                |
| Date Submitted by the Author: | 11-May-2022                                                                                                                                                                                                                                                                                                                                                                                                                                                                                                                                                                                                                                                                                                                                                                                                                                                                                                                                                                                                                                                                                                                                                                                                                                                                                                                                                                                                                                                                                                                                                                                                                                                                                                                                                                                                                                                                                                                                                                                                                                                                                                                                                                                                                                                                                                                                                                                                                                                             |
| Complete List of Authors:     | <p>Retzer, Ameeta; University of Birmingham, Centre for Patient Reported Outcomes Research, Institute for Applied Health Research; National Institute for Health and Care Research (NIHR), Applied Research Centre, West Midlands</p> <p>Sivell, Stephanie; Cardiff University, Marie Curie Palliative Care Research Centre, Division of Population Medicine, Cardiff University School of Medicine, College of Biomedical and Life Sciences</p> <p>Scott, Hannah; University of Cambridge, Cambridge Public Health, University of Cambridge School of Clinical Medicine</p> <p>Nelson, Annmarie; Cardiff University School of Medicine, Marie Curie Palliative Care Research Centre, Division of Population Medicine, Cardiff University School of Medicine, College of Biomedical and Life Sciences</p> <p>Bulbeck, Helen; brainstrust</p> <p>Seddon, Kathy; Cardiff University</p> <p>Grant, Robin ; Department of Clinical Neurosciences, Royal Infirmary of Edinburgh</p> <p>Adams, Richard; University of Cardiff, Centre for Trials Research</p> <p>Watts, Colin; University of Birmingham, Institute of Cancer and Genomic Sciences, College of Medical and Dental Sciences</p> <p>Aiyegbusi, Olalekan Lee; University of Birmingham, Centre for Patient Reported Outcomes Research, Institute of Applied Health Research; University of Birmingham, NIHR Birmingham Biomedical Research Centre, University of Birmingham and University Hospitals Birmingham NHS Foundation Trust</p> <p>Kearns, Pamela; University of Birmingham, Institute of Cancer and Genomic Sciences, College of Medical and Dental Sciences; University of Birmingham, NIHR Birmingham Biomedical Research Centre</p> <p>Cruz Rivera, Samantha; University of Birmingham, Centre for Patient Reported Outcomes Research, Institute of Applied Health Research; University of Birmingham, Birmingham Health Partners Centre for Regulatory Science and Innovation</p> <p>Dirven, Linda; Leiden University, Department of Neurology, Leiden University Medical Center; Medical Centre Haaglanden, Department of Neurology</p> <p>Baddeley, Elin; Cardiff University, Marie Curie Palliative Care Research Centre, Division of Population Medicine, Cardiff University School of Medicine, College of Biomedical and Life Sciences</p> <p>Calvert , Melanie ; University of Birmingham, Centre for Patient Reported Outcomes Research, Institute of Applied Health Research; National</p> |

|                                 |                                                                                                                                                                                                                                                                                          |
|---------------------------------|------------------------------------------------------------------------------------------------------------------------------------------------------------------------------------------------------------------------------------------------------------------------------------------|
|                                 | Institute for Health and Care Research (NIHR), Applied Research Centre West Midlands<br>Byrne, Anthony; Cardiff University, Marie Curie Palliative Care Research Centre, Division of Population Medicine, Cardiff University School of Medicine, College of Biomedical and Life Sciences |
| <b>Primary Subject Heading</b>: | Oncology                                                                                                                                                                                                                                                                                 |
| Secondary Subject Heading:      | Palliative care, Patient-centred medicine, Qualitative research, Research methods                                                                                                                                                                                                        |
| Keywords:                       | Neurological oncology < NEUROLOGY, Neurological oncology < ONCOLOGY, Adult palliative care < PALLIATIVE CARE, QUALITATIVE RESEARCH, Clinical trials < THERAPEUTICS                                                                                                                       |
|                                 |                                                                                                                                                                                                                                                                                          |

SCHOLARONE™  
Manuscripts

1  
2  
3  
4 **Development of a Core Outcome Set and Identification of Patient-Reportable Outcomes**  
5 **for Primary Brain Tumour Trials: Protocol for the COBra Study**  
6

7 Authors: Ameeta Retzer<sup>1,2,3</sup>, Stephanie Sivell<sup>4</sup>, Hannah Scott<sup>5</sup>, Annmarie Nelson<sup>4</sup>, Helen  
8 Bulbeck<sup>6</sup>, Kathy Seddon<sup>7</sup>, Robin Grant<sup>8</sup>, Richard Adams<sup>9</sup>, Colin Watts<sup>10</sup>, Olalekan Lee  
9 Aiyegbusi<sup>1,2,3,11,12</sup>, Pamela Kearns<sup>10,12,13</sup>, Samantha Cruz Rivera<sup>1,2,11</sup>, Linda Dirven<sup>14,15</sup>, Elin  
10 Baddeley<sup>4</sup>, Melanie Calvert<sup>1,2,3,11,12,16,17</sup>, Anthony Byrne<sup>4</sup>  
11

12  
13 <sup>1</sup>Institute of Applied Health Research, University of Birmingham, Birmingham, UK  
14

15 <sup>2</sup>Centre for Patient Reported Outcomes Research, Institute of Applied Health Research,  
16 University of Birmingham, Birmingham, UK  
17

18 <sup>3</sup>National Institute for Health and Care Research (NIHR) Applied Research Centre West  
19 Midlands, Birmingham, UK  
20

21 <sup>4</sup> Marie Curie Palliative Care Research Centre, Division of Population Medicine, Cardiff  
22 University School of Medicine, College of Biomedical and Life Sciences, UK  
23

24 <sup>5</sup> Cambridge Public Health, University of Cambridge School of Clinical Medicine, UK  
25

26 <sup>6</sup> Brainstrust - the brain cancer people, UK  
27

28 <sup>7</sup>Cardiff University, UK  
29

30 <sup>8</sup> Department of Clinical Neurosciences, Royal Infirmary of Edinburgh, UK  
31

32 <sup>9</sup> Centre for Trials Research, Cardiff University, UK  
33

34 <sup>10</sup> Institute of Cancer and Genomic Sciences, College of Medical and Dental Sciences,  
35 University of Birmingham, UK  
36

37 <sup>11</sup>Birmingham Health Partners Centre for Regulatory Science and Innovation, University of  
38 Birmingham, Birmingham, UK  
39

40 <sup>12</sup>NIHR Birmingham Biomedical Research Centre, University of Birmingham, Birmingham, UK  
41

42 <sup>13</sup> Cancer Research UK Clinical Trials Unit (CRCTU), Institute of Cancer and Genomic Sciences,  
43 University of Birmingham, UK<sup>14</sup> Department of Neurology, Leiden University Medical Center,  
44 Leiden, The Netherlands  
45

46 <sup>15</sup> Department of Neurology, Haaglanden Medical Center, The Hague, The Netherlands  
47  
48  
49  
50  
51  
52  
53  
54  
55  
56  
57  
58  
59  
60

<sup>16</sup>NIHR Surgical Reconstruction and Microbiology Research Centre, University of Birmingham, Birmingham, UK

<sup>17</sup>Midlands Health Data Research UK, Birmingham, UK

Correspondence to: Professor Anthony Byrne (anthony.byrne2@wales.nhs.uk)

## Abstract:

### Introduction

Primary brain tumours, specifically gliomas, are a rare disease group. The disease and treatment negatively impacts on patients and those close to them. The high rates of physical and cognitive morbidity differ from other cancers causing reduced health-related quality of life. Glioma trials using outcomes that allow holistic analysis of treatment benefits and risks enable informed care decisions. Currently, outcome assessment in glioma trials is inconsistent, hindering evidence synthesis. A core outcome set (COS): an agreed minimum set of outcomes to be measured and reported may address this. International initiatives focus on defining core outcomes assessments across brain tumour types. This protocol describes the development of a COS for use in glioma trials, applicable across glioma types involving UK stakeholders, with provision to identify subsets as required. Due to stakeholder interest in data reported from the patient perspective, outcomes from the COS that can be patient-reported will be identified.

### Methods and analysis

Stage I: (i) trial registry review to identify outcomes collected in glioma trials and (ii) systematic review of qualitative literature exploring glioma patient and key stakeholder research priorities. Stage II: semi-structured interviews with glioma patients and caregivers. Outcome lists will be generated from Stages I and II. Stage III: study team will remove duplicate items from the outcome lists and ensure accessible terminology for inclusion in the Delphi survey. Stage IV: a two-round Delphi process whereby the outcomes will be rated by key stakeholders. Stage V: a consensus meeting where participants will finalise the COS. The study team will identify the COS outcomes that can be patient-reported. Further research is needed to match patient-reported outcomes to available measures.

### Ethics and dissemination

Ethical approval was obtained (REF SMREC 21/59, Cardiff University School of Medicine Research Ethics Committee). Study findings will be disseminated widely through conferences and journal publication. The final COS will be adopted and promoted by patient and carer groups and its use by funders encouraged.

### Trial and PROSPERO registration

Core Outcome Measures in Effectiveness Trials (<https://www.comet-initiative.org/Studies/Details/1793>); PROSPERO (CRD42021236979).



### Strengths and Limitations

- This study collects original qualitative data to ensure all outcomes prioritised by glioma patients are identified. However, this is a resource-intensive process that may not be available to all core outcome set developers.
- Review of trial registries represents a pragmatic approach to comprehensively identify outcomes used in trials rather than reliance on often incomplete outcome reporting in glioma trial publications[1]. There are limitations to this approach - use of trial registries means those that are not registered will not be identified, registry use is inconsistent globally, completeness and specificity can be questionable, and updating of entries continues to be a challenge[2]. However, the quality of registration has been observed to be improving and trial registration associated with subsequent publication and use of the same outcomes as defined in their protocols as in their published reports[3].
- Bias may be introduced by inviting qualitative interview participants from Stage II to take part in Delphi; though this encourages familiarity with concepts, enabling meaningful participation in the Delphi
- Qualitative data collected from the UK population may limit international applicability, though this allows exploration of issues that may be specific to UK context and validation of this COS for use in other settings should be explored.

### Introduction:

Primary brain tumours, specifically gliomas, are part of a rare disease group[4]. The disease and its treatment have negative effects on patients and those close to them. The high rates of physical and cognitive morbidity differ from other cancers, with significant impact on a wide range of functional domains. Gliomas are the commonest form of primary brain tumour[5], accounting for 80% of malignant brain tumours. Gliomas represent a heterogeneous group of cancers with variable outcome, traditionally graded from I to IV (least to most aggressive) [2]. However, rapid developments in molecular diagnostics have led to refinements in nomenclature, suggesting a more nuanced approach to brain tumours classification[6]. This would acknowledge the spectrum ranging from a variable but slower-progressing course, such as oligodendroglioma or astrocytoma, to fast-growing tumours such as glioblastoma, a particularly aggressive subtype with a median survival of 12 to 15 months and 5% five year survival rate[7].

The poor prognosis of some glioma patients and the high symptom burden has led to a growing emphasis on their quality of survival[8]. Maintaining cognitive function, physical function and other health-related quality of life aspects throughout the disease trajectory are key considerations alongside very modest survival benefits captured through traditional metrics of tumour response and overall or progression-free survival, particularly for patients with aggressive forms of glioma [9]. Therefore, it is important that glioma intervention studies collect a range of data aligned with patient priorities to enable assessment of the net clinical benefit of treatments [10-13].

Data collected to evidence effects of interventions are known as “outcomes”. Outcomes include traditional measures such as progression-free survival and radiological tumour response but also Clinical Outcome Assessments (COAs). COAs describe how a patient feels,

1  
2  
3 functions, or survives. COAs include Clinician Reported Outcomes (ClinRO), Observer  
4 Reported Outcomes (ObsRO), Performance Outcomes (PerfO), and Patient Reported  
5 Outcomes (PROs)[14]. PROs assess a range of outcomes including symptoms, functional  
6 health, well-being and psychological issues from the patients' perspective, without  
7 interpretation by a clinician or anyone else [15]. When assessing treatments, PROs enable  
8 insight into the impact of treatment on patient's perceived wellbeing where other outcome  
9 data that may indicate minimal differences in disease control and survival, potentially  
10 influencing patients' treatment choices [16].  
11  
12  
13

14 Interpreting the clinical benefit of treatments requires effective data synthesis and meta-  
15 analyses of trial outcomes. This requires consistent use of outcomes, use of appropriate  
16 outcome measures, and diligent data capture, analysis and reporting. Inconsistent outcome  
17 use is widespread. A significant lack of standard ontology has been found in cancer clinical  
18 trials [17] and in brain tumour studies specifically[18]. Moreover, selective outcome and  
19 missing data reporting is common[19], introducing bias and hindering evidence synthesis.  
20 PROs are critical to the comprehensive evaluation of treatment benefits and side effects,  
21 and are increasingly used by regulatory authorities. The Food and Drug Administration (FDA)  
22 is prioritising a patient-centred approach to drug development[20], a consistent approach to  
23 PRO use generally [21], and in cancer clinical trials specifically[22].The European Medicines  
24 Agency (EMA) support PRO use to assess drug efficacy and tolerability in informing product  
25 approval in cancer[23], consistent with the FDA[24, 25]. Key PROs for use in cancer has been  
26 of consistent interest[22, 26, 27], patients value this form of data [28-31], and it underpins  
27 informed shared decision-making [32-35]. However, there is limited consensus on which  
28 areas of patient experience should be consistently assessed in brain tumour trials. In cancer  
29 trials using PROs, analyses are often unreported in publications and the clinical relevance of  
30 PRO results are overlooked [36]. A systematic review of glioma randomised controlled trials  
31 (RCTs) using PROs found that only 14% of these trials met the criteria for high quality  
32 reporting [37], with PRO results not being interpreted in 79%, and clinical relevance not  
33 discussed in 86% of trials.  
34  
35  
36  
37  
38  
39

40 There are international efforts to unify and improve practice. In PRO research in the field of  
41 neuro-oncology, the Response Assessment in Neuro-Oncology Patient Reported Outcomes  
42 (RANO-PRO) working group aims to provide guidance on Patient-Reported Outcome  
43 Measures (PROMs) in adult neuro-oncology clinical trials and practice (23). Their systematic  
44 review (26) found that 215 PROs have been used in brain tumour (primary and secondary)  
45 studies, the majority only used once or twice. The FDA and EMA recognise the importance  
46 of assessing symptoms, adverse effects and function as core constructs in all glioma  
47 trials[38], and have participated in an international multi-stakeholder workshop aiming to  
48 define a core set of priority constructs to be assessed as minimum in high grade glioma trials  
49 and care[39].  
50  
51  
52

53 Core Outcome Sets (COS) establish 'the minimum that should be measured and reported in  
54 all clinical trials of a specific condition' [40], aiming to achieve consensus between  
55 researchers, clinicians, patients and policy makers. This facilitates consistent outcome  
56 collection, analysis, and reporting, enables data synthesis and meta-analyses, reduces  
57 research waste, and informs patient-centred care. Upon COS confirmation, further research  
58 will determine how to measure these outcomes.  
59  
60

1  
2  
3  
4  
5  
6  
7  
8  
9  
10  
11  
12  
13  
14  
15  
16  
17  
18  
19  
20  
21  
22  
The primary aim of this research is to develop a COS from a UK perspective for use in adult primary glioma (astrocytoma, oligodendroglioma, oligoastrocytoma, ependymoma, astroblastoma, anaplastic ganglioglioma, glioblastoma, glioblastoma multiforme) phase III interventional trials comprising all outcome types. We will define outcomes applicable to all glioma as well those that may be specific to glioma types. The COS will inform interpretation of the net clinical benefit of interventions in terms that reflect stakeholder priorities. Due to interest in core PROs in cancer, our secondary aim is to identify the COS outcomes which can be patient reported.

### 23 24 25 26 27 28 29 30 31 32 **Focus of COS**

This COS will apply to phase III interventional trials for systemic anti-cancer treatments (including immunotherapy and chemotherapy), radiotherapy, surgery, and supportive care involving adults (aged over 18 years), diagnosed with glioma, with a specific focus on the UK population. Though some data formulating this COS will be drawn from a UK sample, trialists should consider the COS to be applicable internationally. To promote generalisability of results, recruitment into the qualitative interviews and Delphi exercise will be monitored for glioma type, age, ethnicity, and gender.

### 33 34 35 36 37 38 39 40 41 42 43 44 **Methods and analysis**

#### 35 36 37 38 39 40 41 42 43 44 **Objectives:**

1. Trial registry review to identify glioma trial outcomes and a systematic review of the qualitative literature to explore key stakeholders' research and treatment priorities;
2. Identify outcomes using qualitative interviews with glioma patients and caregivers;
3. Combine the results of Objectives 1 and 2 into a unified longlist of outcomes;
4. Achieve consensus on a COS through online Delphi process and a consensus meeting with a range of stakeholders.

#### 45 46 47 48 49 50 51 52 53 **Study Design**

The COBra (Patient Reported Core Outcomes in Brain Tumour Trials) study uses a mixed-methods, multi-stage approach in accordance with accepted COS methodology [41] and guidance[42] (Appendix 1) and registered with the Core Outcome Measures in Effectiveness Trials (COMET) Initiative[43].

#### 53 54 55 56 57 58 59 60 **Study Team and Collaborators**

The study team is multidisciplinary, including Patient and Public Involvement (PPI) representatives, healthcare professionals, researchers, policy makers, and regulators.

The Marie Curie Palliative Care Research Centre Cardiff, the Centre for Patient Reported Outcomes Research, the Centre for Trials Research (Cardiff University) and Birmingham

1  
2  
3 Clinical Trials Unit (CTU) will provide methodological steer on behalf of the Supportive and  
4 Palliative Care subgroup of the NCRI (National Cancer Research Institute) Brain Tumour  
5 group. Collaboration with the RANO-PRO Initiative[44] working group will ensure alignment  
6 with international efforts.  
7  
8

### 9 *Patient and Public Involvement*

10 The PPI team members contributed to study design and will develop and monitor the study  
11 as part of the Steering Group[45], contributing to data analysis and dissemination of study  
12 findings. The study team will seek advice from a wider panel of PPI representatives  
13 convened for the purpose of the study, consisting of individuals with a range of backgrounds  
14 and experiences. The detailed participation of PPI representatives will be reported in  
15 accordance with GRIPP2 (Guidance for Reporting Involvement of Patients and the Public)  
16 [46].  
17  
18  
19  
20  
21  
22

## 23 **Stage I – Evidence review**

### 24 **Aims**

25 Review of clinical trial registries and a systematic review of published qualitative literature  
26 to generate an outcome list [41] from:  
27  
28

- 29 A) Phase III interventional glioma trials involving adult patients and diagnosed with primary  
30 glioma;
- 31 B) Qualitative studies exploring the lived experience and research priorities of adult  
32 patients with primary glioma, and other key stakeholders.  
33  
34  
35

### 36 **Search strategy and data extraction**

#### 37 *Search A*

38 ClinicalTrials.gov and ISRCTN clinical trials registries, based in the US and UK respectively,  
39 will be used to identify outcomes used in phase III interventional glioma trials in adults  
40 (Appendix 2). Data from both are available for public download. Where protocols are  
41 available alongside registration information, these will be retrieved.  
42  
43  
44

45 Two reviewers will independently perform complete searches of glioma trials registered on  
46 clinicaltrials.gov and isrctn.com without restriction by date. The results will be  
47 independently reviewed for eligibility; disagreements will be resolved with a third reviewer.  
48 Two reviewers will independently extract data including basic trial information, year of  
49 study, primary outcome(s) and secondary outcomes. Data in the csv files will be cross-  
50 referenced with clinical trial registration entry for completeness, and with the protocol  
51 when available. The most recently updated of these will be used.  
52  
53

54 Trials sourced during Search A will be cross-referenced with those retrieved from the RANO-  
55 PRO study for information.  
56  
57

#### 58 *Search B*

59  
60

1  
2  
3 We will systematically review the qualitative literature describing the experiences and needs  
4 of adults diagnosed with glioma and thematically synthesise (44) their 'lived experiences' in  
5 relation to care, treatment and treatment outcomes.  
6  
7

8 Databases to be searched include MEDLINE, EMBASE, CINAHL, Web of Science, PsycINFO,  
9 the Cochrane Central Register of Controlled Trials and the Cochrane Library. Reference lists  
10 of key authors and journals will be hand searched. Qualitative studies, or mixed-method  
11 studies containing qualitative data, published in the English language, restricted to 15 years  
12 prior, will be included. This is because of limited data prior and literature captured is more  
13 reflective of current treatment options and patient perspective Research involving adult  
14 patients and/or key stakeholders including informal caregivers, will be included. Two  
15 reviewers will independently review all titles and abstracts; a third reviewer will review  
16 citations for any disagreements. Full text studies will be reviewed by two reviewers;  
17 disagreements will be resolved with a third reviewer.  
18  
19

20  
21 Two reviewers will independently extract data using a standardised data collection form,  
22 capturing the themes and sub-themes of the qualitative data pertaining to the lived  
23 experience of patients with primary glioma. The qualitative literature will be thematically  
24 synthesised following three stages: coding text, developing descriptive themes and  
25 generating themes[47]. The data will focus on patients and key stakeholders including  
26 informal caregivers, exploring their interpretation of patients' 'lived experiences', including  
27 views relating to their attitudes and experience of symptoms and functional outcomes.  
28 NVivo[48] will be used for data management.  
29  
30

### 31 32 **Stage II – Interviews with patients and caregivers**

33 Semi-structured interviews will be conducted with adults diagnosed with primary glioma  
34 across the spectrum of the disease. Interview participants can identify a caregiver to join  
35 them in an interview dyad. The interviews will inform the language used in the Delphi  
36 survey and identify outcomes not captured during Stage I.  
37  
38

### 39 40 **Aims**

41 The objectives of these interviews are to explore:

- 42 (i) outcomes that are important to patients;
- 43 (ii) caregivers' understanding of patients' priorities and experiences, as these may  
44 differ.  
45

### 46 47 **Participant eligibility and sampling**

48 Dyads will comprise eligible patients histologically diagnosed with primary glioma  
49 (astrocytoma, oligodendroglioma, oligoastrocytoma, ependymoma, astroblastoma,  
50 anaplastic ganglioglioma, glioblastoma, glioblastoma multiforme) and a caregiver identified  
51 by the patient. Caregivers are defined as informal carers, who may be a family member or  
52 friend, who provides the majority of the support to the patient and is able to estimate the  
53 patient's priorities. Patients and caregivers will be over the age of 18 years.  
54  
55

56  
57 Participants will be recruited through the NCRI Brain Group, the Tessa Jowell BRAIN MATRIX  
58 trial platform[49], CTUs, brainstrust – the brain cancer people, The Brain Tumour Charity,  
59 snowballing, known contacts, and social media platforms. Potential participants will be  
60

1  
2  
3 invited to contact the research team to express interest. Recruitment will be monitored to  
4 promote diversity in terms of glioma type, age, ethnicity, and gender, seeking balance  
5 between glioma types. Between 12 and 20 dyads representing the spectrum of malignant  
6 disease will be recruited based on previous studies and expected data saturation[50]. Data  
7 saturation will be assessed through constant discussion and evaluation of the data by the  
8 qualitative researchers conducting the data collection and analysis, together with members  
9 of the wider study team. Recruitment will end when data saturation is reached.  
10  
11

### 12 13 **Consent and Capacity**

14 Patients and caregivers will give consent on their own behalf if they wish to participate in an  
15 interview. If a patient or caregiver does not proceed with an interview, the other will still be  
16 invited to participate. Their permission is not required for the other to participate.  
17 Information sheets will be sent to eligible participants via post or email with the contact  
18 details of the research team member conducting the interviews. Participants expressing  
19 interest will be given the chance to ask any questions prior to consent. Participants will  
20 complete an electronic or hardcopy consent form or will be recorded giving verbal consent,  
21 depending on interview format.  
22  
23  
24

25 In accordance with the Mental Capacity Act (2005), patient participants will be assumed to  
26 have capacity unless it is proven otherwise. If there is concern that the patient lacks capacity  
27 to participate, this will be discussed with the Chief Investigator, a clinician, about whether  
28 further research activity will occur. If research will not continue with the patient participant,  
29 the caregiver will be given the opportunity to take part in an interview to share their views.  
30  
31  
32

### 33 **Data collection**

34 A semi-structured interview format will be used to understand patient experiences of living  
35 with glioma, and what they consider to be the most important outcomes from glioma  
36 treatment. Caregiver participants' perspective of patients' experience and priorities will be  
37 captured, not a direct report of the patients' condition. The interviews will be undertaken  
38 via phone or video link (e.g. Zoom or Microsoft Teams), or face-to-face, depending on the  
39 situation and preference of patients. Interviews may take place with patients and caregivers  
40 together or separately, depending on their preference. Interviews where patients and  
41 caregivers are interviewed separately allow for differing views to be expressed. Where  
42 interviews are undertaken together, efforts will be made to ensure both are able to express  
43 their views. Interviews will be audio-recorded. The interview will be guided by open-ended  
44 questions on diagnosis, treatment, and their effects on patients and caregivers, directed  
45 towards understanding outcomes important to patients. The semi-structured format allows  
46 for spontaneous exploration of novel topics. The topic-guide may be reviewed and adapted  
47 iteratively after the first few interviews, if required. At the end of the interviews,  
48 participants will be asked directly which outcomes they believe should be measured in  
49 clinical trials. This places the lived experience of participants at the forefront, with patients  
50 and caregivers given the chance to talk about the things that matter most to them.  
51  
52  
53  
54  
55

### 56 **Data Analysis**

57 The interview data, once transcribed and anonymised, will be thematically analysed [51]  
58 using NVivo software [48] for data management. A preliminary framework will be derived  
59 from the available literature including the Thematic analysis allows for the identification of  
60

1  
2  
3 patterns and themes within the data, to organise and describe data in rich detail[51]. It is  
4 particularly well-suited to studies that focus on lived experience. Data collected from  
5 patients and caregivers will be analysed and formulated into separate accounts.  
6  
7

8 Analysis of the first three transcripts will be conducted independently by two members of  
9 the research team experienced in qualitative research and a draft coding structure will be  
10 formulated. Disagreements in coding will be resolved through discussion and input from a  
11 third qualitative researcher will be sought when required. The draft coding frame will be  
12 reviewed by PPI team members and a coding structure for the remaining transcripts will be  
13 confirmed. The framework will be refined, until the analysis of all transcripts has been  
14 completed, with the findings synthesised into categories and subcategories.  
15  
16

### 17 **Stage III – Review of outcome list**

18 All outcomes, without limitation by outcome type, captured in Stage I will be grouped and  
19 classified [41]. A broad ontology for this will be developed from the framework outlined in  
20 the COMET handbook and relevant frameworks from the available literature[38] in advance  
21 of outcome extraction and will be iteratively refined based on the outcomes identified. The  
22 ontology will serve as a categorical tool to organise and present the outcomes in an  
23 accessible manner. Each grouping will contain domains and subdomains that broadly  
24 measure particular aspects of the effects of interventions (e.g. symptoms and function)[52].  
25 The outcome lists formed by each of the two researchers will be compared for  
26 completeness, and differences in the categorisation will be resolved through discussion.  
27  
28  
29

30  
31 The categories and subcategories generated in Stage II will be formulated into an outcome  
32 list and differences in the categorisation will be resolved through discussion.  
33  
34

35 A longlist of outcomes will be generated from the Stage I and II outcome lists. Duplicates  
36 will be removed during this process. This list will be reviewed by the study team to refine  
37 the language used to describe the outcomes. The team will review the structure of the  
38 questions included in the Delphi survey. At this stage, it will be decided whether separate  
39 Delphi processes are needed according to glioma type based on the emerging data.  
40  
41

### 42 **Stage IV – Delphi survey**

43  
44 A modified two-round Delphi will be used to assess the relative importance of outcomes  
45 included in the stage III outcome list. Participants will be invited to consider applicability of  
46 the COS to new and emerging therapies, and whether the outcomes would apply. The aim  
47 of the Delphi process is to reach consensus on which outcomes should form the COS for  
48 glioma trials.  
49  
50

### 51 **Recruitment**

52  
53 Approximately 100 participants with professional or personal experience of glioma care and  
54 treatment: 1) patients, 2) caregivers, 3) healthcare professionals and researchers, 4) policy-  
55 makers and regulators will be recruited as previously described in earlier stages. During  
56 Delphi registration participants will choose the stakeholder group with which they most  
57 identify but can note if they identify with other stakeholder groups besides their primary.  
58 Approximately 25 participants will be recruited to each stakeholder group, recruitment will  
59  
60

1  
2  
3 be monitored and will inform and direct efforts as required. Consent will be taken  
4 electronically during the online registration process.  
5

### 6 7 **Delphi process**

8 The Delphi exercise will reflect COMET recommendations [41] and will present the Stage III  
9 outcome list. Participants will rate each of the outcomes on a 9-point Likert scale, (1–3, not  
10 important; 4–6, important but not critical; and 7–9, important and critical)[53]. During  
11 Round 1, participants can add outcomes they feel are missing. Votes from individuals in  
12 each stakeholder group will be given equal weighting. All original outcomes will be  
13 presented in Round 2. Outcomes added by participants in Round 1 will be presented in  
14 Round 2. In Round 2, respondents will be presented with their own rating for each outcome  
15 and how it was rated by their own stakeholder group. Based on this information,  
16 respondents will be invited to amend their score, if they wish. During Round 2, participants  
17 can rate the outcomes suggested in Round 1.  
18  
19  
20

21 The threshold for consensus for inclusion in or exclusion from the COS will be  $\geq 70\%$ ,  
22 informed by those used in comparable COS development studies [54, 55]. After the Delphi,  
23 outcomes will be proposed for inclusion in the final COS if  $\geq 70\%$  respondents rate the item  
24 as 7-9 and  $\leq 15\%$  rate the item as 1-3. Items will be proposed for exclusion from the final  
25 COS if  $\geq 70\%$  respondents rate the item as 1-3 and  $\leq 15\%$  rate the item as 7-9. Those  
26 outcomes that do not reach agreement after the two Delphi rounds will be discussed in the  
27 consensus meeting, together with the items proposed for inclusion and exclusion.  
28  
29  
30

### 31 **Missing data**

32 To minimise partial response, participants will be unable to skip questions but can indicate  
33 when they feel unable to rank specific items. Reminders will be used to minimise participant  
34 attrition between Delphi rounds. Use of specialised Delphi software, Delphi Manager, will  
35 enable rapid inter-round rating calculations to allow the second round to open with minimal  
36 delay to further reduce attrition.  
37  
38  
39  
40

### 41 **Stage V consensus meeting**

42 This meeting may be held virtually or in person, depending on the situation and preference  
43 of the majority of participants. All Delphi participants will be invited. Notes will be taken  
44 during the meeting and consent will be sought from all participants to audio-record the  
45 meeting for reference. Decisions made during the consensus meeting will be made through  
46 anonymous voting using voting software. Decisions will proceed if ratified by  $\geq 70\%$  of the  
47 group. In cases where there is  $< 100\%$  consensus, decisions will be discussed until those in  
48 disagreement are satisfied that their views have been considered and that the decision can  
49 proceed. This meeting allows for a further opportunity to discuss, validate and the confirm  
50 the final COS. The core outcomes applicable to all glioma trials will be agreed, as will any  
51 outcomes identified as specific to particular types of glioma. Following the consensus  
52 meeting, the study team will identify which of the outcomes could be assessed by patient  
53 reporting.  
54  
55  
56  
57  
58  
59

### 60 **Ethics and dissemination**



1  
2  
3 Ethical approval was granted (REF: SMREC 21/59, Cardiff University School of Medicine  
4 Research Ethics Committee). All data will be collected and stored in accordance with local  
5 regulations[56].  
6  
7

8 The final COS will be published in compliance with accepted reporting standards [41] and  
9 adopted and promoted by the NCRI Brain Clinical Studies Group Supportive and Palliative  
10 Care subgroup for use in glioma studies. The subgroup will publish a position statement  
11 mandating for UK CTUs involved in brain tumour research to implement the COS.  
12 Study findings will be disseminated widely, including to national and international  
13 conferences and high-impact journals. A plain English summary will be co-produced with PPI  
14 team members and made available to participants upon request. The COS will be promoted  
15 amongst patient and carer groups using The Brain Tumour Charity network (including  
16 BRIAN), NCRI and regional PPI frameworks, brainstrust, and other patient organisations. The  
17 importance of COS development is increasingly recognised by funders, such as the National  
18 Institute for Health and Care Research, and regulators, such as EMA and FDA. The COS will  
19 therefore be promoted to encourage its inclusion in 'justification of outcomes' sections of  
20 funding proposals and regulatory submissions. The final COS will be freely available on the  
21 COMET database.  
22  
23  
24  
25

26 Though some data used to develop this COS will be drawn from a UK perspective, the trial  
27 registry searches were without restriction based on country and the qualitative literature  
28 were limited to those in English language only. The study steering committee has  
29 membership stakeholders leading international initiatives and the Delphi survey and  
30 consensus meeting will involve participants from international regulatory bodies. As a  
31 result, the resulting COS should be considered to be internationally applicable. For use in  
32 other settings or countries, validation exercises are advised to ensure economic and cultural  
33 differences are integrated. The study team will consider the findings of this study in the  
34 context of existing international initiatives. Findings will be shared with international  
35 partners and may be integrated into international guidance on outcome assessment across  
36 all brain tumour types.  
37  
38  
39

40 COBra will directly collaborate with the RANO-PRO working group and affiliated  
41 international initiatives to share the UK perspective. Following study completion, RANO-PRO  
42 findings may be used to select appropriate COAs aligned to the COS. COBra will also  
43 collaborate with UK funders, trialists and CTUs on COS implementation and the consistent  
44 application of international standards for collection, analysis and reporting of the COS  
45 across all UK studies.  
46  
47

48 Following finalising the COS, further research is required to identify and/or develop  
49 corresponding outcome measures.  
50  
51  
52  
53  
54  
55

## 56 **References**

57  
58  
59  
60

1. Tardy, M.P., et al., *Quality of Randomized Controlled Trials Reporting in the Treatment of Adult Patients with High-Grade Gliomas*. *Oncologist*, 2018. **23**(3): p. 337-345.
2. Viergever, R.F. and K. Li, *Trends in global clinical trial registration: an analysis of numbers of registered clinical trials in different parts of the world from 2004 to 2013*. *BMJ Open*, 2015. **5**(9): p. e008932.
3. Chan, A.-W., et al., *Association of Trial Registration With Reporting of Primary Outcomes in Protocols and Publications*. *JAMA*, 2017. **318**(17): p. 1709-1711.
4. Diseases, N.O.f.R. *Glioma*. 2019 [cited 2021 21 September].
5. Goodenberger, M.L. and R.B. Jenkins, *Genetics of adult glioma*. *Cancer Genet*, 2012. **205**(12): p. 613-21.
6. Wood, M.D., A.M. Halfpenny, and S.R. Moore, *Applications of molecular neuro-oncology - a review of diffuse glioma integrated diagnosis and emerging molecular entities*. *Diagnostic Pathology*, 2019. **14**(1): p. 29.
7. UK, C.R. *Survival*. 2019 [cited 2021 1 June].
8. Sagberg, L.M., O. Solheim, and A.S. Jakola, *Quality of survival the 1st year with glioblastoma: a longitudinal study of patient-reported quality of life*. *Journal of Neurosurgery JNS*, 2016. **124**(4): p. 989-997.
9. Basch, E., et al., *Patient-Reported Outcomes in Cancer Drug Development and US Regulatory Review: Perspectives From Industry, the Food and Drug Administration, and the Patient*. *JAMA Oncol*, 2015. **1**(3): p. 375-9.
10. MacDonald, L.o.b.o.t.N.-O.G. *Top 10 priorities for clinical research in primary brain and spinal cord tumours: final report of the James Lind Alliance Priority Setting Partnership in Neuro-Oncology*. 2015 28 January 2021].
11. Collins, A., et al., *The challenges and suffering of caring for people with primary malignant glioma: qualitative perspectives on improving current supportive and palliative care practices*. *BMJ Support Palliat Care*, 2014. **4**(1): p. 68-76.
12. Piil, K., et al., *Controlled rehabilitative and supportive care intervention trials in patients with high-grade gliomas and their caregivers: a systematic review*. *BMJ Support Palliat Care*, 2016. **6**(1): p. 27-34.
13. Armstrong, T.S. and M.R. Gilbert, *Net clinical benefit: functional endpoints in brain tumor clinical trials*. *Curr Oncol Rep*, 2007. **9**(1): p. 60-5.
14. Administration, U.F.a.D. *Clinical Outcome Assessment (COA) Qualification Program*. 2021 [cited 2021 1 June].
15. FDA. *Guidance for industry: Patient-Reported outcome measures: Use in medical product development to support labeling claims*. 2009 [cited 2021 2 June].
16. Fairclough, D.L., *Patient reported outcomes as endpoints in medical research*. *Statistical Methods in Medical Research*, 2004. **13**(2): p. 115-138.
17. Hirsch, B.R., et al., *Characteristics of oncology clinical trials: insights from a systematic analysis of ClinicalTrials.gov*. *JAMA Intern Med*, 2013. **173**(11): p. 972-9.
18. Dirven, L., et al., *Systematic review on the use of patient-reported outcome measures in brain tumor studies: part of the Response Assessment in Neuro-Oncology Patient-Reported Outcome (RANO-PRO) initiative*. *Neuro-Oncology Practice*, 2021.
19. Kirkham, J.J., et al., *Can a core outcome set improve the quality of systematic reviews?--a survey of the Co-ordinating Editors of Cochrane Review Groups*. *Trials*, 2013. **14**: p. 21.
20. Administration, F.a.D. *FDA Patient-Focused Drug Development Guidance Series for Enhancing the Incorporation of the Patient's Voice in Medical Product Development and Regulatory Decision Making*. 2020 [cited 2021 3 August].
21. *Guidance for industry: patient-reported outcome measures: use in medical product development to support labeling claims: draft guidance*. *Health Qual Life Outcomes*, 2006. **4**: p. 79.

22. Administration, F.a.D. *Core Patient-Reported Outcomes in Cancer Clinical Trials: Draft Guidance for Industry*. 2021 [cited 2021 3 August].
23. Agency, E.M. *Appendix 2 to the guideline on the evaluation of anticancer medicinal products in man : The use of patient-reported outcome (PRO) measures in oncology studies*. 2016 [cited 2021 3 August].
24. Basch, E. and C. Yap, *Patient-Reported Outcomes for Tolerability Assessment in Phase I Cancer Clinical Trials*. JNCI: Journal of the National Cancer Institute, 2021. **113**(8): p. 943-944.
25. Kluetz, P.G., et al., *Informing the Tolerability of Cancer Treatments Using Patient-Reported Outcome Measures: Summary of an FDA and Critical Path Institute Workshop*. Value Health, 2018. **21**(6): p. 742-747.
26. Reeve, B.B., et al., *Recommended Patient-Reported Core Set of Symptoms to Measure in Adult Cancer Treatment Trials*. JNCI: Journal of the National Cancer Institute, 2014. **106**(7).
27. Kluetz, P.G., et al., *Focusing on Core Patient-Reported Outcomes in Cancer Clinical Trials: Symptomatic Adverse Events, Physical Function, and Disease-Related Symptoms*. Clin Cancer Res, 2016. **22**(7): p. 1553-8.
28. Calvert, M.J. and N. Freemantle, *Use of health-related quality of life in prescribing research. Part 1: why evaluate health-related quality of life?* J Clin Pharm Ther, 2003. **28**(6): p. 513-21.
29. Ouwens, M., et al., *Development of indicators for patient-centred cancer care*. Support Care Cancer, 2010. **18**(1): p. 121-30.
30. Brundage, M., et al., *Cancer patients' preferences for communicating clinical trial quality of life information: a qualitative study*. Qual Life Res, 2003. **12**(4): p. 395-404.
31. Davison, B.J., et al., *Provision of individualized information to men and their partners to facilitate treatment decision making in prostate cancer*. Oncol Nurs Forum, 2003. **30**(1): p. 107-14.
32. England, N. *Shared decision making*. 2021 [cited 2021 1 June].
33. Excellence, N.I.f.H.a.C. *Shared decision making*. 2021 [cited 2021 1 June].
34. Au, H.J., et al., *Added value of health-related quality of life measurement in cancer clinical trials: the experience of the NCIC CTG*. Expert Rev Pharmacoecon Outcomes Res, 2010. **10**(2): p. 119-28.
35. Basch, E., *Toward patient-centered drug development in oncology*. N Engl J Med, 2013. **369**(5): p. 397-400.
36. Pe, M., et al., *Statistical analysis of patient-reported outcome data in randomised controlled trials of locally advanced and metastatic breast cancer: a systematic review*. Lancet Oncol, 2018. **19**(9): p. e459-e469.
37. Dirven, L., et al., *The level of patient-reported outcome reporting in randomised controlled trials of brain tumour patients: a systematic review*. Eur J Cancer, 2014. **50**(14): p. 2432-48.
38. Armstrong, T.S., et al., *Glioma patient-reported outcome assessment in clinical care and research: a Response Assessment in Neuro-Oncology collaborative report*. The Lancet Oncology, 2020. **21**(2): p. e97-e103.
39. Helfer, J.L., et al., *Report of the Jumpstarting Brain Tumor Drug Development Coalition and FDA clinical trials clinical outcome assessment endpoints workshop (October 15, 2014, Bethesda MD)*. Neuro-oncology, 2016. **18 Suppl 2**(Suppl 2): p. ii26-ii36.
40. Kirkham, J.J., et al., *Core Outcome Set-STAndards for Development: The COS-STAD recommendations*. PLoS Med, 2017. **14**(11): p. e1002447.
41. Williamson, P.R., et al., *The COMET Handbook: version 1.0*. Trials, 2017. **18**(Suppl 3): p. 280.
42. Kirkham, J.J., et al., *Core Outcome Set-STANDARDISED Protocol Items: the COS-STAP Statement*. Trials, 2019. **20**(1): p. 116.
43. Byrne A, S.S., Scott H, Nelson A, Seddon K, Calvert M, Retzer A, Grant R, Bulbeck H, Adams R, Watts C, Aiyegbusi OL, Kearns P, Cruz Rivera S. *Patient Reported Core Outcomes in Brain Tumour Trials: the COBra study*. 2020 [cited 2021 5 August].

- 1
- 2
- 3
- 4 44. Dirven, L., et al., *Working plan for the use of patient-reported outcome measures in adults with brain tumours: a Response Assessment in Neuro-Oncology (RANO) initiative*. *Lancet Oncol*, 2018. **19**(3): p. e173-e180.
- 5
- 6 45. INVOLVE. *UK Standards for Public Involvement: Better public involvement for better health and social care*. 2019 [cited 2021 4 August].
- 7
- 8 46. Staniszewska, S., et al., *GRIPP2 reporting checklists: tools to improve reporting of patient and public involvement in research*. *Bmj*, 2017. **358**: p. j3453.
- 9
- 10 47. Thomas, J. and A. Harden, *Methods for the thematic synthesis of qualitative research in systematic reviews*. *BMC Med Res Methodol*, 2008. **8**: p. 45.
- 11
- 12 48. Ltd, Q.I.P. *NVivo qualitative data analysis software*. 2020 [cited 2021 1 June].
- 13
- 14 49. Birmingham, U.o. *Tessa Jowell BRAIN MATRIX*. 2020 [cited 2021 5 August].
- 15
- 16 50. Saunders, B., et al., *Saturation in qualitative research: exploring its conceptualization and operationalization*. *Qual Quant*, 2018. **52**(4): p. 1893-1907.
- 17
- 18 51. Braun, V. and V. Clarke, *Using thematic analysis in psychology*. *Qualitative Research in Psychology*, 2006. **3**(2): p. 77-101.
- 19
- 20 52. Health, N.I.o. *Patient-Reported Outcomes Measurement Information System—PROMIS*. 2019 [cited 2021 29 January].
- 21
- 22 53. Guyatt, G.H., et al., *GRADE guidelines: 2. Framing the question and deciding on important outcomes*. *J Clin Epidemiol*, 2011. **64**(4): p. 395-400.
- 23
- 24 54. Waters, A.M., et al., *The CONSENSUS study: protocol for a mixed methods study to establish which outcomes should be included in a core outcome set for oropharyngeal cancer*. *Trials*, 2014. **15**: p. 168.
- 25
- 26 55. Fish, R., et al., *Core outcome research measures in anal cancer (CORMAC): protocol for systematic review, qualitative interviews and Delphi survey to develop a core outcome set in anal cancer*. *BMJ Open*, 2017. **7**(11): p. e018726.
- 27
- 28 56. Department for Digital, C., Media & Sport, Home Office. *Data Protection Act 2018*. 2018 [cited 2021 1 February].
- 29
- 30
- 31
- 32
- 33
- 34
- 35

### Author contribution

The study concept and design was conceived by AR, SS, HS, AN, HB, KS, RG, RA, CW, OLA, PK, SCR, LD, EB, MC, and AB. MC and AR advised on methodology. EB and AR will undertake the registry review, EB and SS will undertake the qualitative systematic review. EB and SS will recruit, screen and consent participants and will undertake the interviews with input from AR and AB. EB will recruit for the Delphi and consensus meeting, with input from SS, AR, and AB. HS prepared the first draft of the manuscript. AR prepared subsequent drafts. SS, HS, AN, HB, KS, RG, RA, CW, OLA, PK, SCR, LD, EB, MC, and AB all provided edits and critiqued the manuscript for intellectual content.

### Funding statement

This study is funded by The Brain Tumour Charity (GN-000704). The funders have no role in study design or manuscript preparation.

### Competing interests

Due to their involvement in the study design, the study team members will not participate in the Delphi process or consensus meeting, other than in a facilitative role. Study team members will encourage engagement and participation in the Delphi process and consensus meeting by individuals within the networks of which they are part, as appropriate.

## Appendix 1

|                                                               |                                                                                                                                                                                                                                                                                       | Page    |
|---------------------------------------------------------------|---------------------------------------------------------------------------------------------------------------------------------------------------------------------------------------------------------------------------------------------------------------------------------------|---------|
| Title 1a                                                      | Identify in the title that the paper describes the protocol for the planned development of a COS                                                                                                                                                                                      | 1       |
| Abstract 1b                                                   | Provide a structured abstract                                                                                                                                                                                                                                                         | 2       |
| INTRODUCTION Background and objectives 2a                     | Describe the background and explain the rationale for developing the COS, and identify the reasons why a COS is needed and the potential barriers to its implementation                                                                                                               | 3-5, 11 |
| 2b                                                            | Describe the specific objectives with reference to developing a COS                                                                                                                                                                                                                   | 5       |
| Scope 3a                                                      | Describe the health condition(s) and population(s) that will be covered by the COS                                                                                                                                                                                                    | 5       |
| 3b                                                            | Describe the intervention(s) that will be covered by the COS                                                                                                                                                                                                                          | 5       |
| 3c                                                            | Describe the context of use for which the COS is to be applied                                                                                                                                                                                                                        | 5       |
| METHODS Stakeholders 4                                        | Describe the stakeholder groups to be involved in the COS development process, the nature of and rationale for their involvement and also how the individuals will be identified; this should cover involvement both as members of the research team and as participants in the study | 7-10    |
| Information sources 5a                                        | Describe the information sources that will be used to identify the list of outcomes. Outline the methods or reference other protocols/papers                                                                                                                                          | 6-10    |
| 5b                                                            | Describe how outcomes may be dropped/ combined, with reasons                                                                                                                                                                                                                          | 9-10    |
| Consensus process 6                                           | Describe the plans for how the consensus process will be undertaken                                                                                                                                                                                                                   | 10      |
| Consensus definition 7a                                       | Describe the consensus definition                                                                                                                                                                                                                                                     | 10      |
| 7b                                                            | Describe the procedure for determining how outcomes will be added/combined/dropped from consideration during the consensus process                                                                                                                                                    | 10      |
| ANALYSIS Outcome scoring/ feedback 8                          | Describe how outcomes will be scored and summarised, describe how participants will receive feedback during the consensus process                                                                                                                                                     | 10      |
| Missing data 9                                                | Describe how missing data will be handled during the consensus process                                                                                                                                                                                                                | 10      |
| ETHICS and DISSEMINATION Ethics approval/ informed consent 10 | Describe any plans for obtaining research ethics committee/institutional review board approval in relation to the consensus process and describe how informed consent will be obtained (if relevant)                                                                                  | 9-11    |
| Dissemination 11                                              | Describe any plans to communicate the results to study participants and COS users, inclusive of methods and timing of dissemination                                                                                                                                                   | 11      |
| ADMINISTRATIVE INFORMATION Funders 12                         | Describe sources of funding, role of funders                                                                                                                                                                                                                                          | 14      |
| Conflicts of interest 13                                      | Describe any potential conflicts of interest within the study team and how they will be managed                                                                                                                                                                                       | 14      |

1  
2  
3  
4  
5  
6  
7  
8  
9  
10  
11  
12  
13  
14  
15  
16  
17  
18  
19  
20  
21  
22  
23  
24  
25  
26  
27  
28  
29  
30  
31  
32  
33  
34  
35  
36  
37  
38  
39  
40  
41  
42  
43  
44  
45  
46  
47  
48  
49  
50  
51  
52  
53  
54  
55  
56  
57  
58  
59  
60

For peer review only

1  
2  
3 Appendix 2  
4  
5

6 1. ClinicalTrials.gov

7 Condition/Disease: glioma OR astrocytoma OR oligodendroglioma OR oligoastrocytoma OR  
8 ependymoma OR astroblastoma OR anaplastic ganglioglioma OR glioblastoma OR GBM OR  
9 Glioblastoma multiforme

10 Study type: Interventional Studies (Clinical Trials)

11 Age: Adult 18-64 AND Older Adult (65+)

12 Phase: III  
13  
14

15 2. ISRCTN.com

16 Each term searched individually:

17 Condition/Disease: glioma; astrocytoma; oligodendroglioma; oligoastrocytoma;  
18 ependymoma; astroblastoma; anaplastic ganglioglioma; glioblastoma; GBM; Glioblastoma  
19 multiforme  
20  
21  
22  
23  
24  
25  
26  
27  
28  
29  
30  
31  
32  
33  
34  
35  
36  
37  
38  
39  
40  
41  
42  
43  
44  
45  
46  
47  
48  
49  
50  
51  
52  
53  
54  
55  
56  
57  
58  
59  
60

| Comment                                                                                                                                                                                                                                                                                                                                                              | Author response                                                                                                                                                                                                                                                                                                                                                                                                                                                                                                                                                                                                                                 |
|----------------------------------------------------------------------------------------------------------------------------------------------------------------------------------------------------------------------------------------------------------------------------------------------------------------------------------------------------------------------|-------------------------------------------------------------------------------------------------------------------------------------------------------------------------------------------------------------------------------------------------------------------------------------------------------------------------------------------------------------------------------------------------------------------------------------------------------------------------------------------------------------------------------------------------------------------------------------------------------------------------------------------------|
| <p><b>Editor</b></p> <p>Please include the name of the ethics committee that approved your study in the Ethics and Dissemination section of the Abstract. Please also include a dissemination statement in this section.</p>                                                                                                                                         | <p>Thank you, this has now been added.</p>                                                                                                                                                                                                                                                                                                                                                                                                                                                                                                                                                                                                      |
| <p>Please also include the name of the ethics committee that approved this study in the ethics statement in the main text.</p>                                                                                                                                                                                                                                       | <p>Thank you, this has now been added.</p>                                                                                                                                                                                                                                                                                                                                                                                                                                                                                                                                                                                                      |
| <p>Please reformat the main text so that it follows the structure recommended in the journal's instructions for authors for study protocols, for example the main text of your manuscript should contain an Ethics and Dissemination section. See: <a href="https://bmjopen.bmj.com/pages/authors/#protocol">https://bmjopen.bmj.com/pages/authors/#protocol</a></p> | <p>Thank you, the titles have been updated and the ethics statement is now included in the Ethics and Dissemination section.</p>                                                                                                                                                                                                                                                                                                                                                                                                                                                                                                                |
| <p>Along with your revised manuscript, please include a copy of the COS-STAP checklist indicating the page/line numbers of your manuscript where the relevant information can be found (<a href="https://doi.org/10.1186/s13063-019-3230-x">https://doi.org/10.1186/s13063-019-3230-x</a>)</p>                                                                       | <p>Thank you – this has now been updated and attached following the edits resulting from the editorial and reviewer comments.</p>                                                                                                                                                                                                                                                                                                                                                                                                                                                                                                               |
| <p><b>Additional changes</b></p>                                                                                                                                                                                                                                                                                                                                     | <p>Minor edits have been made to update affiliations.</p>                                                                                                                                                                                                                                                                                                                                                                                                                                                                                                                                                                                       |
| <p><b>Reviewer 1</b></p> <p>Glioma outcome trials should have perspective from all the stakeholders . a comprehensive outcome measure would give a better choice of selection and planning for all concerned . this kind of study to measure outcome in a comprehensive way is welcome .</p>                                                                         | <p>Thank you for your support of this work. Rather than the development or recommendation of an outcome measurement instrument such as a specific questionnaire, this work aims to identify and finalise the core outcomes to be collected and reported in glioma interventional trials, which can be subsequently aligned with measurement tool(kit)s/instruments.</p>                                                                                                                                                                                                                                                                         |
| <p>I suggest the survey questions should be comprehensive and should not be just question number 123 etc but stakeholder should be able to answer q no 8 . there should be provision for missing data which the participant can answer separately .</p>                                                                                                              | <p>We recognise that currently used questionnaires / instruments may be burdensome for participants, and mechanisms to address this and minimise missing data are essential. With the development of a core outcome set (COS), the aim is to represent the <i>minimum</i> required outcomes to be collected and reported in glioma studies. This will promote consistency in outcome use rather than volume of data, and may reduce missing data.</p> <p>For the Delphi survey to be conducted in our project, we hope to get input from the participants on <i>all</i> the proposed items, as these are deemed relevant in stages I-III of</p> |



|                                                                                                                                                                                                                                                                                                   |                                                                                                                                                                                                                                                                                                                                                                                                                                                                                                                                                                                                                                                                                                                                                                       |
|---------------------------------------------------------------------------------------------------------------------------------------------------------------------------------------------------------------------------------------------------------------------------------------------------|-----------------------------------------------------------------------------------------------------------------------------------------------------------------------------------------------------------------------------------------------------------------------------------------------------------------------------------------------------------------------------------------------------------------------------------------------------------------------------------------------------------------------------------------------------------------------------------------------------------------------------------------------------------------------------------------------------------------------------------------------------------------------|
|                                                                                                                                                                                                                                                                                                   | <p>the project. Of course participants have the option to provide explanations on their choice, including an explanation when they choose not to rate a specific item.</p>                                                                                                                                                                                                                                                                                                                                                                                                                                                                                                                                                                                            |
| <p>many of the questionnaires fall short on this when the participant does not attempt an answer or the answer is not any of the options . this can be corrected if a pilot study is conducted and the lacunae of the survey proforma is corrected .</p>                                          | <p>Thank you for this comment. In this project we will ensure that the perspective of all stakeholders, including patients, is represented in our work in all stages of the work. Indeed, patients and carers will be included in qualitative interviews, and all stakeholders will take part in the Delphi survey and consensus meeting. In this project, we will provide recommendations on the core outcomes that should be measured, not the specific instruments. The choice for an appropriate instrument should be based on relevance (content validity), but also on other psychometric properties of the instrument, as well as patient burden. This work will be done in the future – this has now been stated in the ethics and dissemination section.</p> |
| <p>also i think the consensus statment should be different for different regions keeping in mind economic cultural differences</p>                                                                                                                                                                | <p>We agree that it is important to consider cross cultural differences. The current COS will be developed from a UK perspective only and aims to include participants from the diverse UK population (i.e. heterogeneous population, reflective of the UK population). For use in other settings or countries, we advise validation exercises to ensure economic and cultural differences are integrated. Wording relating to this has been added to the ethics and dissemination section.</p>                                                                                                                                                                                                                                                                       |
| <p>Reviewer 2</p> <p>1. Scope of COS - the team discuss international applicability, but also confirm that the data used to develop the COS will be primarily UK-based. Have the authors considered international recruitment to the patient interviews, Delphi survey and consensus meeting?</p> | <p>Thank you for this comment. Due to the specific experiences and priorities of UK patients within the UK health system, we limited our recruitment to the UK. However, there will be some international participation in the Delphi survey through representation from international regulatory stakeholders. Also, international collaborators are represented on our steering committee and through engagement with colleagues from the Medicines and Healthcare products Regulatory Agency (MHRA), we will be advised on international alignment. Nevertheless, for the COS to be used in other countries / cultures, further validation is necessary. Wording to detail</p>                                                                                     |

|                                                                                                                                                                                                                                                                                                                                                                                                                                                                                                                                                                                                                                                      |                                                                                                                                                                                                                                                                                                                                                                                                                                                                                                                                                                                                                                                                                                                                                                                                                                                                                                                                                                                            |
|------------------------------------------------------------------------------------------------------------------------------------------------------------------------------------------------------------------------------------------------------------------------------------------------------------------------------------------------------------------------------------------------------------------------------------------------------------------------------------------------------------------------------------------------------------------------------------------------------------------------------------------------------|--------------------------------------------------------------------------------------------------------------------------------------------------------------------------------------------------------------------------------------------------------------------------------------------------------------------------------------------------------------------------------------------------------------------------------------------------------------------------------------------------------------------------------------------------------------------------------------------------------------------------------------------------------------------------------------------------------------------------------------------------------------------------------------------------------------------------------------------------------------------------------------------------------------------------------------------------------------------------------------------|
|                                                                                                                                                                                                                                                                                                                                                                                                                                                                                                                                                                                                                                                      | this has been added to the Ethics and Dissemination section.                                                                                                                                                                                                                                                                                                                                                                                                                                                                                                                                                                                                                                                                                                                                                                                                                                                                                                                               |
| <p>2. Identifying potentially important outcomes.</p> <p>a) Could the authors expand on their justification for using protocols and trial registry entries to identify potentially important outcomes, rather than the widely adopted systematic review of published scientific literature? What would the limitations of this be given that, in my experience from similar studies, trial registries can be notoriously inaccurate and sparse with respect to details on which outcomes are planned to be reported. Whilst there is not a single 'best' way to do this, the team's approach should have its strengths and weaknesses discussed.</p> | <p>We agree that this is important to discuss and further justification for rationale for using trial registries has therefore been added to the limitations section of the manuscript.</p>                                                                                                                                                                                                                                                                                                                                                                                                                                                                                                                                                                                                                                                                                                                                                                                                |
| <p>b) What time period will be covered for the trial registries and qualitative literature review and what is the justification for this?</p>                                                                                                                                                                                                                                                                                                                                                                                                                                                                                                        | <p>No limitation was placed on the trial registry search and a 15 year limitation was placed on the qualitative literature search. The rationale for this limit was due to the limited data prior to this point and that the literature captured is more reflective of current treatment options and patient perspective. Wording relating to this has been added to the text.</p>                                                                                                                                                                                                                                                                                                                                                                                                                                                                                                                                                                                                         |
| <p>c) The qualitative literature review is an interesting approach to identifying potentially important outcomes. If there is sufficient body of work in this field, what is the need to undertake a further set of interviews which are resource intensive and costly? As things stand, COS are financially costly and take a long time to develop. This approach will be a valuable methodological consideration for future COS developers.</p>                                                                                                                                                                                                    | <p>Thank you for this insightful observation. This strategy was carefully considered by the steering committee and the study management group. We felt secondary analyses of qualitative literature is limited by the primary interpretation of the data. Including interviews in our project allows in depth exploration of the patient's perspective and analytical clarity on how this may be reflected in outcomes across the spectrum of glioma. We acknowledge that this is an important question and it is a resource intensive process and not necessarily appropriate for use in all COS. Use of qualitative interviews is encouraged in the COMET (Core Outcome Measures in Effectiveness Trials) handbook and their use was carefully considered in this study. A note relating to this has been added to the strengths and limitations section. We will report on the number of unique outcomes identified from this source to add to evidence base and inform future COS.</p> |
| <p>d) If interviews are necessary, how many are planned, or predicted to be necessary?</p>                                                                                                                                                                                                                                                                                                                                                                                                                                                                                                                                                           | <p>Between 12 and 20 dyads representing the spectrum of malignant disease will be recruited based on previous studies and</p>                                                                                                                                                                                                                                                                                                                                                                                                                                                                                                                                                                                                                                                                                                                                                                                                                                                              |

|                                                                                                                                                                                                                                                                                                                                                                                                                                                                                                                                                                                                                           |                                                                                                                                                                                                                                                                                                                                                                                                                                                                                                                                                                                                                                                                                                                                                                                                                                                                |
|---------------------------------------------------------------------------------------------------------------------------------------------------------------------------------------------------------------------------------------------------------------------------------------------------------------------------------------------------------------------------------------------------------------------------------------------------------------------------------------------------------------------------------------------------------------------------------------------------------------------------|----------------------------------------------------------------------------------------------------------------------------------------------------------------------------------------------------------------------------------------------------------------------------------------------------------------------------------------------------------------------------------------------------------------------------------------------------------------------------------------------------------------------------------------------------------------------------------------------------------------------------------------------------------------------------------------------------------------------------------------------------------------------------------------------------------------------------------------------------------------|
|                                                                                                                                                                                                                                                                                                                                                                                                                                                                                                                                                                                                                           | <p>expected data saturation. Data saturation will be assessed through constant discussion and evaluation of the data by the qualitative researchers conducting the data collection and analysis, together with members of the wider study team. Recruitment will end when data saturation is reached. This is currently reported in the methods section.</p>                                                                                                                                                                                                                                                                                                                                                                                                                                                                                                   |
| <p>e) How will the longlist of outcomes be rationalised into items presented in the Delphi survey? What framework will be used and how many items does the team envisage is an ideal number for participants to prioritise?</p>                                                                                                                                                                                                                                                                                                                                                                                           | <p>Details relating to the development of the outcomes lists are now more extensively reported in stage III of the methods, and is in accordance with the approach outlined in the COMET handbook.</p>                                                                                                                                                                                                                                                                                                                                                                                                                                                                                                                                                                                                                                                         |
| <p>Reviewer 3</p> <p>(1) Introduction, page 3, second para: The sentence “These data are known as...” does not follow from the previous statement. Outcomes are any effects of interventions, not just patient priorities, or clinical benefits. It also includes adverse events and many more .</p>                                                                                                                                                                                                                                                                                                                      | <p>Following the reviewer’s suggestion, this sentence has been re-phrased and linked with the next paragraph.</p>                                                                                                                                                                                                                                                                                                                                                                                                                                                                                                                                                                                                                                                                                                                                              |
| <p>(2) Introduction, page 3, fourth para: Please delete “net benefit”, it is about effects or effectiveness in general.</p>                                                                                                                                                                                                                                                                                                                                                                                                                                                                                               | <p>The word “net” has been removed.</p>                                                                                                                                                                                                                                                                                                                                                                                                                                                                                                                                                                                                                                                                                                                                                                                                                        |
| <p>(3) Introduction, page 4, fourth para: What do you mean by “finalise”? Reading the entire protocol, it seems like a new and independent project. If work has already been done, please describe this transparently.</p>                                                                                                                                                                                                                                                                                                                                                                                                | <p>This was indeed not phrased clearly. We have now clarified that this is a new independent project where a COS will be developed and finalised in a consensus meeting.</p>                                                                                                                                                                                                                                                                                                                                                                                                                                                                                                                                                                                                                                                                                   |
| <p>(4) Introduction, page 4, fourth para: The aim of COS is to make trial results comparable worldwide. If a COS is going to be developed, it must be done using an international perspective. Focusing on a specific country perspective makes no sense, because we don’t want to have country specific COS. The statement in the Dissemination part “... applicability internationally should be explored...” (page 11) is also very weak. What does “The study team will consider the findings of .... Existing international initiatives...” mean? If there are international initiatives, they must be involved.</p> | <p>Thank you for this feedback. There are three sources of data used in the identification of outcomes – the trial registries, qualitative literature, and qualitative interviews. The trial registry searches were without restriction based on country and the qualitative literature was limited to those in English language only. Both of these can be considered as international sources. However, the qualitative interviews were only undertaken in the UK so their experiences and priorities may be specific to and shaped by the UK health system. The study steering committee has membership stakeholders leading international initiatives and the Delphi survey and consensus meeting will involve participants from international regulatory bodies. The statement in the introduction describing the UK perspective has been removed and</p> |

|                                                                                                                                                                                                                                                                                                                                                                                                                                                                                                          |                                                                                                                                                                                                                                                                                                                                                                                                                         |
|----------------------------------------------------------------------------------------------------------------------------------------------------------------------------------------------------------------------------------------------------------------------------------------------------------------------------------------------------------------------------------------------------------------------------------------------------------------------------------------------------------|-------------------------------------------------------------------------------------------------------------------------------------------------------------------------------------------------------------------------------------------------------------------------------------------------------------------------------------------------------------------------------------------------------------------------|
|                                                                                                                                                                                                                                                                                                                                                                                                                                                                                                          | the statement in the dissemination section has been re-phrased. This has also been re-worded in the “Focus of COS” section. Nevertheless, for the COS to be used in other countries / cultures, further validation is necessary. Wording relating to this has now been added to the ethics and dissemination section.                                                                                                   |
| (5) Introduction, aim, methods: There is a lot of repetition regarding aims and objectives. The objectives are described in the Background (COS-STAP item 2b) and they don't need to be repeated again and again. The “Objectives” (page 5) belong to the methods and the “Research questions” seems to be little bit out of scope. Especially the last bullet is strange (see above). Later in the methods (page 6) the aims are stated again. List the aims once, the present the methods accordingly. | The aims and objectives section has been split out so the aims are included in the background section and the repetitive parts are removed. The objectives have been moved to the methods section. The research questions have been removed. We hope that the adjusted manuscript reads better.                                                                                                                         |
| (6) Methods, study design, page 5: Please name COBra first, before using the acronym.                                                                                                                                                                                                                                                                                                                                                                                                                    | Thank you for noticing – this has now been corrected.                                                                                                                                                                                                                                                                                                                                                                   |
| (7) Methods, team members, page 5: Please just list who is doing what. Sentences such as “... underpin the methodological approach...” are strange. Please check whether all abbreviations (MCPCRC etc.) are actually needed later in the text. Please explain what PPI and GRIPP is (page 6).                                                                                                                                                                                                           | Thank you – this has been re-worded to clarify the role. The abbreviations that are not used again in the manuscript have been removed and GRIPP2 has been provided in full. PPI is given in full in the first section of the study team section.                                                                                                                                                                       |
| (8) Methods, study summary, page 6: Please delete.                                                                                                                                                                                                                                                                                                                                                                                                                                                       | Following the reviewer's suggestion, this has been deleted.                                                                                                                                                                                                                                                                                                                                                             |
| (9) Methods, search A, page 7: Please consider to look at published trials too.                                                                                                                                                                                                                                                                                                                                                                                                                          | Given the under-reporting of outcomes in trial publications, we decided to use trial registries instead. This issue was also raised by reviewer 1 and further information for the rationale and exploration of the limitations of this approach have been added to the manuscript.                                                                                                                                      |
| (10) Methods, stage III, page 9: How exactly will the extracted outcomes classified? My recommendation is to look what was reported and then develop/define the domains inductively and present these outcomes as they are. Classification may be done later.                                                                                                                                                                                                                                            | The approach for this has been provided in more detail, outlining the development of an ontology and its use as a categorical tool.                                                                                                                                                                                                                                                                                     |
| (11) Delphi study: I would recommend to decide later, whether two rounds are sufficient. It really depends on the length of the list and the voting results. If too many outcome are considered critical, then another voting is necessary.                                                                                                                                                                                                                                                              | Thank you for raising this issue, which we have carefully discussed when setting up the study. The decision to proceed with two rounds was determined in advance as the details of participation are required for informed consent of participants. Two rounds were decided to mitigate attrition between rounds and minimise missing data, reduce time required of participants and promote data completeness. Further |

|                                                                                                                                                                                       |                                                                                                                                                                                                                                                                                                                                                       |
|---------------------------------------------------------------------------------------------------------------------------------------------------------------------------------------|-------------------------------------------------------------------------------------------------------------------------------------------------------------------------------------------------------------------------------------------------------------------------------------------------------------------------------------------------------|
|                                                                                                                                                                                       | <p>to this, the study team was conscious of participant burden in this particular population. The decision reflects the view of the steering committee. The consensus meeting allows for a further opportunity to discuss, validate and confirm the final. Wording to this effect has been added to the consensus meeting section of the methods.</p> |
| <p>(12) Dissemination: Defining COS is good, but please add that outcome measurement instruments need to be developed next. This project will identify the concepts/domains only.</p> | <p>We agree that it is important to emphasize that only the outcomes are identified, and that instruments to assess these outcomes (appropriately) should be identified in later stages. Wording to this effect has now been added to the ethics and dissemination section.</p>                                                                       |
| <p>(13) Abstract: Please adjust accordingly. Don't say "This paper presents..." Instead describe the objectives.</p>                                                                  | <p>Thank you, this has now been re-worded.</p>                                                                                                                                                                                                                                                                                                        |

# BMJ Open

## Development of a Core Outcome Set and Identification of Patient-Reportable Outcomes for Primary Brain Tumour Trials: Protocol for the COBra Study

|                               |                                                                                                                                                                                                                                                                                                                                                                                                                                                                                                                                                                                                                                                                                                                                                                                                                                                                                                                                                                                                                                                                                                                                                                                                                                                                                                                                                                                                                                                                                                                                                                                                                                                                                                                                                                                                                                                                                                                                                                                                                                                                                                                                                                                                                                                                                                                                                                                                                                                                         |
|-------------------------------|-------------------------------------------------------------------------------------------------------------------------------------------------------------------------------------------------------------------------------------------------------------------------------------------------------------------------------------------------------------------------------------------------------------------------------------------------------------------------------------------------------------------------------------------------------------------------------------------------------------------------------------------------------------------------------------------------------------------------------------------------------------------------------------------------------------------------------------------------------------------------------------------------------------------------------------------------------------------------------------------------------------------------------------------------------------------------------------------------------------------------------------------------------------------------------------------------------------------------------------------------------------------------------------------------------------------------------------------------------------------------------------------------------------------------------------------------------------------------------------------------------------------------------------------------------------------------------------------------------------------------------------------------------------------------------------------------------------------------------------------------------------------------------------------------------------------------------------------------------------------------------------------------------------------------------------------------------------------------------------------------------------------------------------------------------------------------------------------------------------------------------------------------------------------------------------------------------------------------------------------------------------------------------------------------------------------------------------------------------------------------------------------------------------------------------------------------------------------------|
| Journal:                      | <i>BMJ Open</i>                                                                                                                                                                                                                                                                                                                                                                                                                                                                                                                                                                                                                                                                                                                                                                                                                                                                                                                                                                                                                                                                                                                                                                                                                                                                                                                                                                                                                                                                                                                                                                                                                                                                                                                                                                                                                                                                                                                                                                                                                                                                                                                                                                                                                                                                                                                                                                                                                                                         |
| Manuscript ID                 | bmjopen-2021-057712.R2                                                                                                                                                                                                                                                                                                                                                                                                                                                                                                                                                                                                                                                                                                                                                                                                                                                                                                                                                                                                                                                                                                                                                                                                                                                                                                                                                                                                                                                                                                                                                                                                                                                                                                                                                                                                                                                                                                                                                                                                                                                                                                                                                                                                                                                                                                                                                                                                                                                  |
| Article Type:                 | Protocol                                                                                                                                                                                                                                                                                                                                                                                                                                                                                                                                                                                                                                                                                                                                                                                                                                                                                                                                                                                                                                                                                                                                                                                                                                                                                                                                                                                                                                                                                                                                                                                                                                                                                                                                                                                                                                                                                                                                                                                                                                                                                                                                                                                                                                                                                                                                                                                                                                                                |
| Date Submitted by the Author: | 12-Jul-2022                                                                                                                                                                                                                                                                                                                                                                                                                                                                                                                                                                                                                                                                                                                                                                                                                                                                                                                                                                                                                                                                                                                                                                                                                                                                                                                                                                                                                                                                                                                                                                                                                                                                                                                                                                                                                                                                                                                                                                                                                                                                                                                                                                                                                                                                                                                                                                                                                                                             |
| Complete List of Authors:     | <p>Retzer, Ameeta; University of Birmingham, Centre for Patient Reported Outcomes Research, Institute for Applied Health Research; National Institute for Health and Care Research (NIHR), Applied Research Centre, West Midlands</p> <p>Sivell, Stephanie; Cardiff University, Marie Curie Palliative Care Research Centre, Division of Population Medicine, Cardiff University School of Medicine, College of Biomedical and Life Sciences</p> <p>Scott, Hannah; University of Cambridge, Cambridge Public Health, University of Cambridge School of Clinical Medicine</p> <p>Nelson, Annmarie; Cardiff University School of Medicine, Marie Curie Palliative Care Research Centre, Division of Population Medicine, Cardiff University School of Medicine, College of Biomedical and Life Sciences</p> <p>Bulbeck, Helen; brainstrust</p> <p>Seddon, Kathy; Cardiff University</p> <p>Grant, Robin ; Department of Clinical Neurosciences, Royal Infirmary of Edinburgh</p> <p>Adams, Richard; University of Cardiff, Centre for Trials Research</p> <p>Watts, Colin; University of Birmingham, Institute of Cancer and Genomic Sciences, College of Medical and Dental Sciences</p> <p>Aiyegbusi, Olalekan Lee; University of Birmingham, Centre for Patient Reported Outcomes Research, Institute of Applied Health Research; University of Birmingham, NIHR Birmingham Biomedical Research Centre, University of Birmingham and University Hospitals Birmingham NHS Foundation Trust</p> <p>Kearns, Pamela; University of Birmingham, Institute of Cancer and Genomic Sciences, College of Medical and Dental Sciences; University of Birmingham, NIHR Birmingham Biomedical Research Centre</p> <p>Cruz Rivera, Samantha; University of Birmingham, Centre for Patient Reported Outcomes Research, Institute of Applied Health Research; University of Birmingham, Birmingham Health Partners Centre for Regulatory Science and Innovation</p> <p>Dirven, Linda; Leiden University, Department of Neurology, Leiden University Medical Center; Medical Centre Haaglanden, Department of Neurology</p> <p>Baddeley, Elin; Cardiff University, Marie Curie Palliative Care Research Centre, Division of Population Medicine, Cardiff University School of Medicine, College of Biomedical and Life Sciences</p> <p>Calvert , Melanie ; University of Birmingham, Centre for Patient Reported Outcomes Research, Institute of Applied Health Research; National</p> |

|                                                    |                                                                                                                                                                                                                                                                                          |
|----------------------------------------------------|------------------------------------------------------------------------------------------------------------------------------------------------------------------------------------------------------------------------------------------------------------------------------------------|
|                                                    | Institute for Health and Care Research (NIHR), Applied Research Centre West Midlands<br>Byrne, Anthony; Cardiff University, Marie Curie Palliative Care Research Centre, Division of Population Medicine, Cardiff University School of Medicine, College of Biomedical and Life Sciences |
| <b>&lt;b&gt;Primary Subject Heading&lt;/b&gt;:</b> | Oncology                                                                                                                                                                                                                                                                                 |
| Secondary Subject Heading:                         | Palliative care, Patient-centred medicine, Qualitative research, Research methods                                                                                                                                                                                                        |
| Keywords:                                          | Neurological oncology < NEUROLOGY, Neurological oncology < ONCOLOGY, Adult palliative care < PALLIATIVE CARE, QUALITATIVE RESEARCH, Clinical trials < THERAPEUTICS                                                                                                                       |
|                                                    |                                                                                                                                                                                                                                                                                          |

SCHOLARONE™  
Manuscripts

1  
2  
3  
4 **Development of a Core Outcome Set and Identification of Patient-Reportable Outcomes**  
5 **for Primary Brain Tumour Trials: Protocol for the COBra Study**  
6

7 Authors: Ameeta Retzer<sup>1,2,3</sup>, Stephanie Sivell<sup>4</sup>, Hannah Scott<sup>5</sup>, Annmarie Nelson<sup>4</sup>, Helen  
8 Bulbeck<sup>6</sup>, Kathy Seddon<sup>7</sup>, Robin Grant<sup>8</sup>, Richard Adams<sup>9</sup>, Colin Watts<sup>10</sup>, Olalekan Lee  
9 Aiyegbusi<sup>1,2,3,11,12</sup>, Pamela Kearns<sup>10,12,13</sup>, Samantha Cruz Rivera<sup>1,2,11</sup>, Linda Dirven<sup>14,15</sup>, Elin  
10 Baddeley<sup>4</sup>, Melanie Calvert<sup>1,2,3,11,12,16,17</sup>, Anthony Byrne<sup>4</sup>  
11

12  
13 <sup>1</sup>Institute of Applied Health Research, University of Birmingham, Birmingham, UK  
14

15 <sup>2</sup>Centre for Patient Reported Outcomes Research, Institute of Applied Health Research,  
16 University of Birmingham, Birmingham, UK  
17

18 <sup>3</sup>National Institute for Health and Care Research (NIHR) Applied Research Centre West  
19 Midlands, Birmingham, UK  
20

21 <sup>4</sup> Marie Curie Palliative Care Research Centre, Division of Population Medicine, Cardiff  
22 University School of Medicine, College of Biomedical and Life Sciences, UK  
23

24 <sup>5</sup> Cambridge Public Health, University of Cambridge School of Clinical Medicine, UK  
25

26 <sup>6</sup> Brainstrust - the brain cancer people, UK  
27

28 <sup>7</sup>Cardiff University, UK  
29

30 <sup>8</sup> Department of Clinical Neurosciences, Royal Infirmary of Edinburgh, UK  
31

32 <sup>9</sup> Centre for Trials Research, Cardiff University, UK  
33

34 <sup>10</sup> Institute of Cancer and Genomic Sciences, College of Medical and Dental Sciences,  
35 University of Birmingham, UK  
36

37 <sup>11</sup>Birmingham Health Partners Centre for Regulatory Science and Innovation, University of  
38 Birmingham, Birmingham, UK  
39

40 <sup>12</sup>NIHR Birmingham Biomedical Research Centre, University of Birmingham, Birmingham, UK  
41

42 <sup>13</sup> Cancer Research UK Clinical Trials Unit (CRCTU), Institute of Cancer and Genomic Sciences,  
43 University of Birmingham, UK<sup>14</sup> Department of Neurology, Leiden University Medical Center,  
44 Leiden, The Netherlands  
45

46 <sup>15</sup> Department of Neurology, Haaglanden Medical Center, The Hague, The Netherlands  
47  
48  
49  
50  
51  
52  
53  
54  
55  
56  
57  
58  
59  
60



<sup>16</sup>NIHR Surgical Reconstruction and Microbiology Research Centre, University of Birmingham, Birmingham, UK

<sup>17</sup>Midlands Health Data Research UK, Birmingham, UK

Correspondence to: Professor Anthony Byrne (anthony.byrne2@wales.nhs.uk)

## **Abstract:**

### **Introduction**

Primary brain tumours, specifically gliomas, are a rare disease group. The disease and treatment negatively impacts on patients and those close to them. The high rates of physical and cognitive morbidity differ from other cancers causing reduced health-related quality of life. Glioma trials using outcomes that allow holistic analysis of treatment benefits and risks enable informed care decisions. Currently, outcome assessment in glioma trials is inconsistent, hindering evidence synthesis. A core outcome set (COS): an agreed minimum set of outcomes to be measured and reported may address this. International initiatives focus on defining core outcomes assessments across brain tumour types. This protocol describes the development of a COS for use in glioma trials, applicable across glioma types involving UK stakeholders, with provision to identify subsets as required. Due to stakeholder interest in data reported from the patient perspective, outcomes from the COS that can be patient-reported will be identified.

### **Methods and analysis**

Stage I: (i) trial registry review to identify outcomes collected in glioma trials and (ii) systematic review of qualitative literature exploring glioma patient and key stakeholder research priorities. Stage II: semi-structured interviews with glioma patients and caregivers. Outcome lists will be generated from Stages I and II. Stage III: study team will remove duplicate items from the outcome lists and ensure accessible terminology for inclusion in the Delphi survey. Stage IV: a two-round Delphi process whereby the outcomes will be rated by key stakeholders. Stage V: a consensus meeting where participants will finalise the COS. The study team will identify the COS outcomes that can be patient-reported. Further research is needed to match patient-reported outcomes to available measures.

### **Ethics and dissemination**

Ethical approval was obtained (REF SMREC 21/59, Cardiff University School of Medicine Research Ethics Committee). Study findings will be disseminated widely through conferences and journal publication. The final COS will be adopted and promoted by patient and carer groups and its use by funders encouraged.

### **Trial and PROSPERO registration**

Core Outcome Measures in Effectiveness Trials (<https://www.comet-initiative.org/Studies/Details/1793>); PROSPERO (CRD42021236979).

### Strengths and Limitations

- This study collects original qualitative data to ensure all outcomes prioritised by glioma patients are identified. However, this is a resource-intensive process that may not be available to all core outcome set developers.
- Review of trial registries represents a pragmatic approach to comprehensively identify outcomes used in trials rather than reliance on often incomplete outcome reporting in glioma trial publications[1]. There are limitations to this approach - use of trial registries means those that are not registered will not be identified, registry use is inconsistent globally, completeness and specificity can be questionable, and updating of entries continues to be a challenge[2]. However, the quality of registration has been observed to be improving and trial registration associated with subsequent publication and use of the same outcomes as defined in their protocols as in their published reports[3].
- Bias may be introduced by inviting qualitative interview participants from Stage II to take part in Delphi; though this encourages familiarity with concepts, enabling meaningful participation in the Delphi
- Qualitative data collected from the UK population may limit international applicability, though this allows exploration of issues that may be specific to UK context and validation of this COS for use in other settings should be explored.

### Introduction:

Primary brain tumours, specifically gliomas, are part of a rare disease group[4]. The disease and its treatment have negative effects on patients and those close to them. The high rates of physical and cognitive morbidity differ from other cancers, with significant impact on a wide range of functional domains. Gliomas are the commonest form of primary brain tumour[5], accounting for 80% of malignant brain tumours. Gliomas represent a heterogeneous group of cancers with variable outcome, traditionally graded from I to IV (least to most aggressive) [2]. However, rapid developments in molecular diagnostics have led to refinements in nomenclature, suggesting a more nuanced approach to brain tumours classification[6]. This would acknowledge the spectrum ranging from a variable but slower-progressing course, such as oligodendroglioma or astrocytoma, to fast-growing tumours such as glioblastoma, a particularly aggressive subtype with a median survival of 12 to 15 months and 5% five year survival rate[7].

The poor prognosis of some glioma patients and the high symptom burden has led to a growing emphasis on their quality of survival[8]. Maintaining cognitive function, physical function and other health-related quality of life aspects throughout the disease trajectory are key considerations alongside very modest survival benefits captured through traditional metrics of tumour response and overall or progression-free survival, particularly for patients with aggressive forms of glioma [9]. Therefore, it is important that glioma intervention studies collect a range of data aligned with patient priorities to enable assessment of the net clinical benefit of treatments [10-13].

Data collected to evidence effects of interventions are known as “outcomes”. Outcomes include traditional measures such as progression-free survival and radiological tumour response but also Clinical Outcome Assessments (COAs). COAs describe how a patient feels,

1  
2  
3 functions, or survives. COAs include Clinician Reported Outcomes (ClinRO), Observer  
4 Reported Outcomes (ObsRO), Performance Outcomes (PerfO), and Patient Reported  
5 Outcomes (PROs)[14]. PROs assess a range of outcomes including symptoms, functional  
6 health, well-being and psychological issues from the patients' perspective, without  
7 interpretation by a clinician or anyone else [15]. When assessing treatments, PROs enable  
8 insight into the impact of treatment on patient's perceived wellbeing where other outcome  
9 data that may indicate minimal differences in disease control and survival, potentially  
10 influencing patients' treatment choices [16].  
11  
12  
13

14 Interpreting the clinical benefit of treatments requires effective data synthesis and meta-  
15 analyses of trial outcomes. This requires consistent use of outcomes, use of appropriate  
16 outcome measures, and diligent data capture, analysis and reporting. Inconsistent outcome  
17 use is widespread. A significant lack of standard ontology has been found in cancer clinical  
18 trials [17] and in brain tumour studies specifically[18]. Moreover, selective outcome and  
19 missing data reporting is common[19], introducing bias and hindering evidence synthesis.  
20 PROs are critical to the comprehensive evaluation of treatment benefits and side effects,  
21 and are increasingly used by regulatory authorities. The Food and Drug Administration (FDA)  
22 is prioritising a patient-centred approach to drug development[20], a consistent approach to  
23 PRO use generally [21], and in cancer clinical trials specifically[22].The European Medicines  
24 Agency (EMA) support PRO use to assess drug efficacy and tolerability in informing product  
25 approval in cancer[23], consistent with the FDA[24, 25]. Key PROs for use in cancer has been  
26 of consistent interest[22, 26, 27], patients value this form of data [28-31], and it underpins  
27 informed shared decision-making [32-35]. However, there is limited consensus on which  
28 areas of patient experience should be consistently assessed in brain tumour trials. In cancer  
29 trials using PROs, analyses are often unreported in publications and the clinical relevance of  
30 PRO results are overlooked [36]. A systematic review of glioma randomised controlled trials  
31 (RCTs) using PROs found that only 14% of these trials met the criteria for high quality  
32 reporting [37], with PRO results not being interpreted in 79%, and clinical relevance not  
33 discussed in 86% of trials.  
34  
35  
36  
37  
38  
39

40 There are international efforts to unify and improve practice. In PRO research in the field of  
41 neuro-oncology, the Response Assessment in Neuro-Oncology Patient Reported Outcomes  
42 (RANO-PRO) working group aims to provide guidance on Patient-Reported Outcome  
43 Measures (PROMs) in adult neuro-oncology clinical trials and practice (23). Their systematic  
44 review (26) found that 215 PROs have been used in brain tumour (primary and secondary)  
45 studies, the majority only used once or twice. The FDA and EMA recognise the importance  
46 of assessing symptoms, adverse effects and function as core constructs in all glioma  
47 trials[38], and have participated in an international multi-stakeholder workshop aiming to  
48 define a core set of priority constructs to be assessed as minimum in high grade glioma trials  
49 and care[39].  
50  
51  
52

53 Core Outcome Sets (COS) establish 'the minimum that should be measured and reported in  
54 all clinical trials of a specific condition' [40], aiming to achieve consensus between  
55 researchers, clinicians, patients and policy makers. This facilitates consistent outcome  
56 collection, analysis, and reporting, enables data synthesis and meta-analyses, reduces  
57 research waste, and informs patient-centred care. Upon COS confirmation, further research  
58 will determine how to measure these outcomes.  
59  
60

1  
2  
3  
4  
5  
6  
7  
8  
9  
10  
11  
12  
13  
14  
15  
16  
17  
18  
19  
20  
21  
22  
23  
24  
25  
26  
27  
28  
29  
30  
31  
32  
33  
34  
35  
36  
37  
38  
39  
40  
41  
42  
43  
44  
45  
46  
47  
48  
49  
50  
51  
52  
53  
54  
55  
56  
57  
58  
59  
60

The primary aim of this research is to develop a COS for use in adult primary glioma (astrocytoma, oligodendroglioma, oligoastrocytoma, ependymoma, astroblastoma, anaplastic ganglioglioma, glioblastoma, glioblastoma multiforme) phase III interventional trials comprising all outcome types. We will define outcomes applicable to all glioma as well as those that may be specific to glioma types. The COS will inform interpretation of the net clinical benefit of interventions in terms that reflect stakeholder priorities. Due to interest in core PROs in cancer, our secondary aim is to identify the COS outcomes which can be patient reported.

### Focus of COS

This COS will apply to phase III interventional trials for systemic anti-cancer treatments (including immunotherapy and chemotherapy), radiotherapy, surgery, and supportive care involving adults (aged over 18 years), diagnosed with glioma, with a specific focus on the UK population. Though some data formulating this COS will be drawn from a UK sample, trialists should consider the COS to be applicable internationally. To promote generalisability of results, recruitment into the qualitative interviews and Delphi exercise will be monitored for glioma type, age, ethnicity, and gender.

### Methods and analysis

#### Objectives:

1. Trial registry review to identify glioma trial outcomes and a systematic review of the qualitative literature to explore key stakeholders' research and treatment priorities;
2. Identify outcomes using qualitative interviews with glioma patients and caregivers;
3. Combine the results of Objectives 1 and 2 into a unified longlist of outcomes;
4. Achieve consensus on a COS through online Delphi process and a consensus meeting with a range of stakeholders.

#### Study Design

The COBra (Patient Reported Core Outcomes in Brain Tumour Trials) study uses a mixed-methods, multi-stage approach in accordance with accepted COS methodology [41] and guidance[42] (Appendix 1) and registered with the Core Outcome Measures in Effectiveness Trials (COMET) Initiative[43].

#### Study Team and Collaborators

The study team is multidisciplinary, including Patient and Public Involvement (PPI) representatives, healthcare professionals, researchers, policy makers, and regulators.

The Marie Curie Palliative Care Research Centre Cardiff, the Centre for Patient Reported Outcomes Research, the Centre for Trials Research (Cardiff University) and Birmingham Clinical Trials Unit (CTU) will provide methodological steer on behalf of the Supportive and Palliative Care subgroup of the NCRI (National Cancer Research Institute) Brain Tumour group. Collaboration with the RANO-PRO Initiative[44] working group will ensure alignment with international efforts.

### *Patient and Public Involvement*

The PPI team members contributed to study design and will develop and monitor the study as part of the Steering Group[45], contributing to data analysis and dissemination of study findings. The study team will seek advice from a wider panel of PPI representatives convened for the purpose of the study, consisting of individuals with a range of backgrounds and experiences. The detailed participation of PPI representatives will be reported in accordance with GRIPP2 (Guidance for Reporting Involvement of Patients and the Public) [46].

## **Stage I – Evidence review**

### **Aims**

Review of clinical trial registries and a systematic review of published qualitative literature to generate an outcome list [41] from:

- A) Phase III interventional glioma trials involving adult patients and diagnosed with primary glioma;
- B) Qualitative studies exploring the lived experience and research priorities of adult patients with primary glioma, and other key stakeholders.

### **Search strategy and data extraction**

#### *Search A*

ClinicalTrials.gov and ISRCTN clinical trials registries, based in the US and UK respectively, will be used to identify outcomes used in phase III interventional glioma trials in adults (Appendix 2). Data from both are available for public download. Where protocols are available alongside registration information, these will be retrieved.

Two reviewers will independently perform complete searches of glioma trials registered on clinicaltrials.gov and isrctn.com without restriction by date. The results will be independently reviewed for eligibility; disagreements will be resolved with a third reviewer. Two reviewers will independently extract data including basic trial information, year of study, primary outcome(s) and secondary outcomes. Data in the csv files will be cross-referenced with clinical trial registration entry for completeness, and with the protocol when available. The most recently updated of these will be used.

Trials sourced during Search A will be cross-referenced with those retrieved from the RANO-PRO study for information.

#### *Search B*

We will systematically review the qualitative literature describing the experiences and needs of adults diagnosed with glioma and thematically synthesise (44) their 'lived experiences' in relation to care, treatment and treatment outcomes.

1  
2  
3  
4  
5  
6  
7  
8  
9  
10  
11  
12  
13  
14  
15  
16  
17  
18  
19  
20  
21  
22  
23  
24  
25  
26  
27  
28  
29  
30  
31  
32  
33  
34  
35  
36  
37  
38  
39  
40  
41  
42  
43  
44  
45  
46  
47  
48  
49  
50  
51  
52  
53  
54  
55  
56  
57  
58  
59  
60

Databases to be searched include MEDLINE, EMBASE, CINAHL, Web of Science, PsycINFO, the Cochrane Central Register of Controlled Trials and the Cochrane Library. Reference lists of key authors and journals will be hand searched. Qualitative studies, or mixed-method studies containing qualitative data, published in the English language, restricted to 15 years prior, will be included. This is because of limited data prior and literature captured is more reflective of current treatment options and patient perspective Research involving adult patients and/or key stakeholders including informal caregivers, will be included. Two reviewers will independently review all titles and abstracts; a third reviewer will review citations for any disagreements. Full text studies will be reviewed by two reviewers; disagreements will be resolved with a third reviewer.

Two reviewers will independently extract data using a standardised data collection form, capturing the themes and sub-themes of the qualitative data pertaining to the lived experience of patients with primary glioma. The qualitative literature will be thematically synthesised following three stages: coding text, developing descriptive themes and generating themes[47]. The data will focus on patients and key stakeholders including informal caregivers, exploring their interpretation of patients' 'lived experiences', including views relating to their attitudes and experience of symptoms and functional outcomes. NVivo[48] will be used for data management.

### **Stage II – Interviews with patients and caregivers**

Semi-structured interviews will be conducted with adults diagnosed with primary glioma across the spectrum of the disease. Interview participants can identify a caregiver to join them in an interview dyad. The interviews will inform the language used in the Delphi survey and identify outcomes not captured during Stage I.

#### **Aims**

The objectives of these interviews are to explore:

- (i) outcomes that are important to patients;
- (ii) caregivers' understanding of patients' priorities and experiences, as these may differ.

#### **Participant eligibility and sampling**

Dyads will comprise eligible patients histologically diagnosed with primary glioma (astrocytoma, oligodendroglioma, oligoastrocytoma, ependymoma, astroblastoma, anaplastic ganglioglioma, glioblastoma, glioblastoma multiforme) and a caregiver identified by the patient. Caregivers are defined as informal carers, who may be a family member or friend, who provides the majority of the support to the patient and is able to estimate the patient's priorities. Patients and caregivers will be over the age of 18 years.

Participants will be recruited through the NCRI Brain Group, the Tessa Jowell BRAIN MATRIX trial platform[49], CTUs, brainstrust – the brain cancer people, The Brain Tumour Charity, snowballing, known contacts, and social media platforms. Potential participants will be invited to contact the research team to express interest. Recruitment will be monitored to promote diversity in terms of glioma type, age, ethnicity, and gender, seeking balance between glioma types. Between 12 and 20 dyads representing the spectrum of malignant disease will be recruited based on previous studies and expected data saturation[50]. Data

1  
2  
3 saturation will be assessed through constant discussion and evaluation of the data by the  
4 qualitative researchers conducting the data collection and analysis, together with members  
5 of the wider study team. Recruitment will end when data saturation is reached.  
6  
7

### 8 **Consent and Capacity**

9 Patients and caregivers will give consent on their own behalf if they wish to participate in an  
10 interview. If a patient or caregiver does not proceed with an interview, the other will still be  
11 invited to participate. Their permission is not required for the other to participate.  
12

13 Information sheets will be sent to eligible participants via post or email with the contact  
14 details of the research team member conducting the interviews. Participants expressing  
15 interest will be given the chance to ask any questions prior to consent. Participants will  
16 complete an electronic or hardcopy consent form or will be recorded giving verbal consent,  
17 depending on interview format.  
18  
19

20 In accordance with the Mental Capacity Act (2005), patient participants will be assumed to  
21 have capacity unless it is proven otherwise. If there is concern that the patient lacks capacity  
22 to participate, this will be discussed with the Chief Investigator, a clinician, about whether  
23 further research activity will occur. If research will not continue with the patient participant,  
24 the caregiver will be given the opportunity to take part in an interview to share their views.  
25  
26

### 27 **Data collection**

28 A semi-structured interview format will be used to understand patient experiences of living  
29 with glioma, and what they consider to be the most important outcomes from glioma  
30 treatment. Caregiver participants' perspective of patients' experience and priorities will be  
31 captured, not a direct report of the patients' condition. The interviews will be undertaken  
32 via phone or video link (e.g. Zoom or Microsoft Teams), or face-to-face, depending on the  
33 situation and preference of patients. Interviews may take place with patients and caregivers  
34 together or separately, depending on their preference. Interviews where patients and  
35 caregivers are interviewed separately allow for differing views to be expressed. Where  
36 interviews are undertaken together, efforts will be made to ensure both are able to express  
37 their views. Interviews will be audio-recorded. The interview will be guided by open-ended  
38 questions on diagnosis, treatment, and their effects on patients and caregivers, directed  
39 towards understanding outcomes important to patients. The semi-structured format allows  
40 for spontaneous exploration of novel topics. The topic-guide may be reviewed and adapted  
41 iteratively after the first few interviews, if required. At the end of the interviews,  
42 participants will be asked directly which outcomes they believe should be measured in  
43 clinical trials. This places the lived experience of participants at the forefront, with patients  
44 and caregivers given the chance to talk about the things that matter most to them.  
45  
46  
47  
48  
49  
50

### 51 **Data Analysis**

52 The interview data, once transcribed and anonymised, will be thematically analysed [51]  
53 using NVivo software [48] for data management. A preliminary framework will be derived  
54 from the available literature including the Thematic analysis allows for the identification of  
55 patterns and themes within the data, to organise and describe data in rich detail[51]. It is  
56 particularly well-suited to studies that focus on lived experience. Data collected from  
57 patients and caregivers will be analysed and formulated into separate accounts.  
58  
59  
60

1  
2  
3 Analysis of the first three transcripts will be conducted independently by two members of  
4 the research team experienced in qualitative research and a draft coding structure will be  
5 formulated. Disagreements in coding will be resolved through discussion and input from a  
6 third qualitative researcher will be sought when required. The draft coding frame will be  
7 reviewed by PPI team members and a coding structure for the remaining transcripts will be  
8 confirmed. The framework will be refined, until the analysis of all transcripts has been  
9 completed, with the findings synthesised into categories and subcategories.  
10  
11

### 12 13 **Stage III – Review of outcome list**

14 All outcomes, without limitation by outcome type, captured in Stage I will be grouped and  
15 classified [41]. A broad ontology for this will be developed from the framework outlined in  
16 the COMET handbook and relevant frameworks from the available literature[38] in advance  
17 of outcome extraction and will be iteratively refined based on the outcomes identified. The  
18 ontology will serve as a categorical tool to organise and present the outcomes in an  
19 accessible manner. Each grouping will contain domains and subdomains that broadly  
20 measure particular aspects of the effects of interventions (e.g. symptoms and function)[52].  
21 The outcome lists formed by each of the two researchers will be compared for  
22 completeness, and differences in the categorisation will be resolved through discussion.  
23  
24

25  
26 The categories and subcategories generated in Stage II will be formulated into an outcome  
27 list and differences in the categorisation will be resolved through discussion.  
28  
29

30 A longlist of outcomes will be generated from the Stage I and II outcome lists. Duplicates  
31 will be removed during this process. This list will be reviewed by the study team to refine  
32 the language used to describe the outcomes. The team will review the structure of the  
33 questions included in the Delphi survey. At this stage, it will be decided whether separate  
34 Delphi processes are needed according to glioma type based on the emerging data.  
35  
36

### 37 38 **Stage IV – Delphi survey**

39 A modified two-round Delphi will be used to assess the relative importance of outcomes  
40 included in the stage III outcome list. Participants will be invited to consider applicability of  
41 the COS to new and emerging therapies, and whether the outcomes would apply. The aim  
42 of the Delphi process is to reach consensus on which outcomes should form the COS for  
43 glioma trials.  
44  
45

### 46 47 **Recruitment**

48 Approximately 100 participants with professional or personal experience of glioma care and  
49 treatment: 1) patients, 2) caregivers, 3) healthcare professionals and researchers, 4) policy-  
50 makers and regulators will be recruited as previously described in earlier stages. During  
51 Delphi registration participants will choose the stakeholder group with which they most  
52 identify but can note if they identify with other stakeholder groups besides their primary.  
53 Approximately 25 participants will be recruited to each stakeholder group, recruitment will  
54 be monitored and will inform and direct efforts as required. Consent will be taken  
55 electronically during the online registration process.  
56  
57  
58

### 59 60 **Delphi process**



1  
2  
3 The Delphi exercise will reflect COMET recommendations [41] and will present the Stage III  
4 outcome list. Participants will rate each of the outcomes on a 9-point Likert scale, (1–3, not  
5 important; 4–6, important but not critical; and 7–9, important and critical)[53]. During  
6 Round 1, participants can add outcomes they feel are missing. Votes from individuals in  
7 each stakeholder group will be given equal weighting. All original outcomes will be  
8 presented in Round 2. Outcomes added by participants in Round 1 will be presented in  
9 Round 2. In Round 2, respondents will be presented with their own rating for each outcome  
10 and how it was rated by their own stakeholder group. Based on this information,  
11 respondents will be invited to amend their score, if they wish. During Round 2, participants  
12 can rate the outcomes suggested in Round 1.  
13  
14  
15

16 The threshold for consensus for inclusion in or exclusion from the COS will be  $\geq 70\%$ ,  
17 informed by those used in comparable COS development studies [54, 55]. After the Delphi,  
18 outcomes will be proposed for inclusion in the final COS if  $\geq 70\%$  respondents rate the item  
19 as 7-9 and  $\leq 15\%$  rate the item as 1-3. Items will be proposed for exclusion from the final  
20 COS if  $\geq 70\%$  respondents rate the item as 1-3 and  $\leq 15\%$  rate the item as 7-9. Those  
21 outcomes that do not reach agreement after the two Delphi rounds will be discussed in the  
22 consensus meeting, together with the items proposed for inclusion and exclusion.  
23  
24  
25

### 26 **Missing data**

27 To minimise partial response, participants will be unable to skip questions but can indicate  
28 when they feel unable to rank specific items. Reminders will be used to minimise participant  
29 attrition between Delphi rounds. Use of specialised Delphi software, Delphi Manager, will  
30 enable rapid inter-round rating calculations to allow the second round to open with minimal  
31 delay to further reduce attrition.  
32  
33  
34  
35

### 36 **Stage V consensus meeting**

37 This meeting may be held virtually or in person, depending on the situation and preference  
38 of the majority of participants. All Delphi participants will be invited. Notes will be taken  
39 during the meeting and consent will be sought from all participants to audio-record the  
40 meeting for reference. Decisions made during the consensus meeting will be made through  
41 anonymous voting using voting software. Decisions will proceed if ratified by  $\geq 70\%$  of the  
42 group. In cases where there is  $< 100\%$  consensus, decisions will be discussed until those in  
43 disagreement are satisfied that their views have been considered and that the decision can  
44 proceed. This meeting allows for a further opportunity to discuss, validate and the confirm  
45 the final COS. The core outcomes applicable to all glioma trials will be agreed, as will any  
46 outcomes identified as specific to particular types of glioma. Following the consensus  
47 meeting, the study team will identify which of the outcomes could be assessed by patient  
48 reporting.  
49  
50  
51  
52  
53

### 54 **Ethics and dissemination**

55 Ethical approval was granted (REF: SMREC 21/59, Cardiff University School of Medicine  
56 Research Ethics Committee). All data will be collected and stored in accordance with local  
57 regulations[56].  
58  
59  
60

1  
2  
3 The final COS will be published in compliance with accepted reporting standards [41] and  
4 adopted and promoted by the NCRI Brain Clinical Studies Group Supportive and Palliative  
5 Care subgroup for use in glioma studies. The subgroup will publish a position statement  
6 mandating for UK CTUs involved in brain tumour research to implement the COS.  
7 Study findings will be disseminated widely, including to national and international  
8 conferences and high-impact journals. A plain English summary will be co-produced with PPI  
9 team members and made available to participants upon request. The COS will be promoted  
10 amongst patient and carer groups using The Brain Tumour Charity network (including  
11 BRIAN), NCRI and regional PPI frameworks, brainstrust, and other patient organisations. The  
12 importance of COS development is increasingly recognised by funders, such as the National  
13 Institute for Health and Care Research, and regulators, such as EMA and FDA. The COS will  
14 therefore be promoted to encourage its inclusion in 'justification of outcomes' sections of  
15 funding proposals and regulatory submissions. The final COS will be freely available on the  
16 COMET database.  
17  
18  
19  
20

21  
22 Though the participants in the original qualitative data collection will be drawn from a UK  
23 sample and the Delphi participants will be largely based in the UK, the trial registry searches  
24 were without restriction based on country and the qualitative literature were limited to  
25 those in English language only. The study steering committee has membership from  
26 stakeholders leading international initiatives and the Delphi survey and consensus meeting  
27 will involve participants from international regulatory bodies. As a result, the resulting COS  
28 should be considered to be internationally applicable. For use in other settings or countries,  
29 validation exercises are advised to ensure economic and cultural differences are integrated.  
30 The study team will consider the findings of this study in the context of existing  
31 international initiatives. Findings will be shared with international partners and may be  
32 integrated into international guidance on outcome assessment across all brain tumour  
33 types.  
34

35  
36 COBra will directly collaborate with the RANO-PRO working group and affiliated  
37 international initiatives. Following study completion, RANO-PRO findings may be used to  
38 select appropriate COAs aligned to the COS. COBra will also collaborate with UK funders,  
39 trialists and CTUs on COS implementation and the consistent application of international  
40 standards for collection, analysis and reporting of the COS across all UK studies.  
41  
42

43  
44 Following finalising the COS, further research is required to identify and/or develop  
45 corresponding outcome measures.  
46  
47  
48  
49  
50  
51

## 52 References

- 53  
54 1. Tardy, M.P., et al., *Quality of Randomized Controlled Trials Reporting in the Treatment of*  
55 *Adult Patients with High-Grade Gliomas*. *Oncologist*, 2018. **23**(3): p. 337-345.
- 56 2. Viergever, R.F. and K. Li, *Trends in global clinical trial registration: an analysis of numbers of*  
57 *registered clinical trials in different parts of the world from 2004 to 2013*. *BMJ Open*, 2015.  
58 **5**(9): p. e008932.  
59  
60

- 1
  - 2
  - 3
  - 4
  - 5
  - 6
  - 7
  - 8
  - 9
  - 10
  - 11
  - 12
  - 13
  - 14
  - 15
  - 16
  - 17
  - 18
  - 19
  - 20
  - 21
  - 22
  - 23
  - 24
  - 25
  - 26
  - 27
  - 28
  - 29
  - 30
  - 31
  - 32
  - 33
  - 34
  - 35
  - 36
  - 37
  - 38
  - 39
  - 40
  - 41
  - 42
  - 43
  - 44
  - 45
  - 46
  - 47
  - 48
  - 49
  - 50
  - 51
  - 52
  - 53
  - 54
  - 55
  - 56
  - 57
  - 58
  - 59
  - 60
3. Chan, A.-W., et al., *Association of Trial Registration With Reporting of Primary Outcomes in Protocols and Publications*. JAMA, 2017. **318**(17): p. 1709-1711.
  4. Diseases, N.O.f.R. *Glioma*. 2019 [cited 2021 21 September].
  5. Goodenberger, M.L. and R.B. Jenkins, *Genetics of adult glioma*. Cancer Genet, 2012. **205**(12): p. 613-21.
  6. Wood, M.D., A.M. Halfpenny, and S.R. Moore, *Applications of molecular neuro-oncology - a review of diffuse glioma integrated diagnosis and emerging molecular entities*. Diagnostic Pathology, 2019. **14**(1): p. 29.
  7. UK, C.R. *Survival*. 2019 [cited 2021 1 June].
  8. Sagberg, L.M., O. Solheim, and A.S. Jakola, *Quality of survival the 1st year with glioblastoma: a longitudinal study of patient-reported quality of life*. Journal of Neurosurgery JNS, 2016. **124**(4): p. 989-997.
  9. Basch, E., et al., *Patient-Reported Outcomes in Cancer Drug Development and US Regulatory Review: Perspectives From Industry, the Food and Drug Administration, and the Patient*. JAMA Oncol, 2015. **1**(3): p. 375-9.
  10. MacDonald, L.o.b.o.t.N.-O.G. *Top 10 priorities for clinical research in primary brain and spinal cord tumours: final report of the James Lind Alliance Priority Setting Partnership in Neuro-Oncology*. 2015 28 January 2021].
  11. Collins, A., et al., *The challenges and suffering of caring for people with primary malignant glioma: qualitative perspectives on improving current supportive and palliative care practices*. BMJ Support Palliat Care, 2014. **4**(1): p. 68-76.
  12. Piil, K., et al., *Controlled rehabilitative and supportive care intervention trials in patients with high-grade gliomas and their caregivers: a systematic review*. BMJ Support Palliat Care, 2016. **6**(1): p. 27-34.
  13. Armstrong, T.S. and M.R. Gilbert, *Net clinical benefit: functional endpoints in brain tumor clinical trials*. Curr Oncol Rep, 2007. **9**(1): p. 60-5.
  14. Administration, U.F.a.D. *Clinical Outcome Assessment (COA) Qualification Program*. 2021 [cited 2021 1 June].
  15. FDA. *Guidance for industry: Patient-Reported outcome measures: Use in medical product development to support labeling claims*. 2009 [cited 2021 2 June].
  16. Fairclough, D.L., *Patient reported outcomes as endpoints in medical research*. Statistical Methods in Medical Research, 2004. **13**(2): p. 115-138.
  17. Hirsch, B.R., et al., *Characteristics of oncology clinical trials: insights from a systematic analysis of ClinicalTrials.gov*. JAMA Intern Med, 2013. **173**(11): p. 972-9.
  18. Dirven, L., et al., *Systematic review on the use of patient-reported outcome measures in brain tumor studies: part of the Response Assessment in Neuro-Oncology Patient-Reported Outcome (RANO-PRO) initiative*. Neuro-Oncology Practice, 2021.
  19. Kirkham, J.J., et al., *Can a core outcome set improve the quality of systematic reviews?--a survey of the Co-ordinating Editors of Cochrane Review Groups*. Trials, 2013. **14**: p. 21.
  20. Administration, F.a.D. *FDA Patient-Focused Drug Development Guidance Series for Enhancing the Incorporation of the Patient's Voice in Medical Product Development and Regulatory Decision Making*. 2020 [cited 2021 3 August].
  21. *Guidance for industry: patient-reported outcome measures: use in medical product development to support labeling claims: draft guidance*. Health Qual Life Outcomes, 2006. **4**: p. 79.
  22. Administration, F.a.D. *Core Patient-Reported Outcomes in Cancer Clinical Trials: Draft Guidance for Industry*. 2021 [cited 2021 3 August].
  23. Agency, E.M. *Appendix 2 to the guideline on the evaluation of anticancer medicinal products in man : The use of patient-reported outcome (PRO) measures in oncology studies*. 2016 [cited 2021 3 August].

24. Basch, E. and C. Yap, *Patient-Reported Outcomes for Tolerability Assessment in Phase I Cancer Clinical Trials*. JNCI: Journal of the National Cancer Institute, 2021. **113**(8): p. 943-944.
25. Kluetz, P.G., et al., *Informing the Tolerability of Cancer Treatments Using Patient-Reported Outcome Measures: Summary of an FDA and Critical Path Institute Workshop*. Value Health, 2018. **21**(6): p. 742-747.
26. Reeve, B.B., et al., *Recommended Patient-Reported Core Set of Symptoms to Measure in Adult Cancer Treatment Trials*. JNCI: Journal of the National Cancer Institute, 2014. **106**(7).
27. Kluetz, P.G., et al., *Focusing on Core Patient-Reported Outcomes in Cancer Clinical Trials: Symptomatic Adverse Events, Physical Function, and Disease-Related Symptoms*. Clin Cancer Res, 2016. **22**(7): p. 1553-8.
28. Calvert, M.J. and N. Freemantle, *Use of health-related quality of life in prescribing research. Part 1: why evaluate health-related quality of life?* J Clin Pharm Ther, 2003. **28**(6): p. 513-21.
29. Ouwens, M., et al., *Development of indicators for patient-centred cancer care*. Support Care Cancer, 2010. **18**(1): p. 121-30.
30. Brundage, M., et al., *Cancer patients' preferences for communicating clinical trial quality of life information: a qualitative study*. Qual Life Res, 2003. **12**(4): p. 395-404.
31. Davison, B.J., et al., *Provision of individualized information to men and their partners to facilitate treatment decision making in prostate cancer*. Oncol Nurs Forum, 2003. **30**(1): p. 107-14.
32. England, N. *Shared decision making*. 2021 [cited 2021 1 June].
33. Excellence, N.I.f.H.a.C. *Shared decision making*. 2021 [cited 2021 1 June].
34. Au, H.J., et al., *Added value of health-related quality of life measurement in cancer clinical trials: the experience of the NCIC CTG*. Expert Rev Pharmacoecon Outcomes Res, 2010. **10**(2): p. 119-28.
35. Basch, E., *Toward patient-centered drug development in oncology*. N Engl J Med, 2013. **369**(5): p. 397-400.
36. Pe, M., et al., *Statistical analysis of patient-reported outcome data in randomised controlled trials of locally advanced and metastatic breast cancer: a systematic review*. Lancet Oncol, 2018. **19**(9): p. e459-e469.
37. Dirven, L., et al., *The level of patient-reported outcome reporting in randomised controlled trials of brain tumour patients: a systematic review*. Eur J Cancer, 2014. **50**(14): p. 2432-48.
38. Armstrong, T.S., et al., *Glioma patient-reported outcome assessment in clinical care and research: a Response Assessment in Neuro-Oncology collaborative report*. The Lancet Oncology, 2020. **21**(2): p. e97-e103.
39. Helfer, J.L., et al., *Report of the Jumpstarting Brain Tumor Drug Development Coalition and FDA clinical trials clinical outcome assessment endpoints workshop (October 15, 2014, Bethesda MD)*. Neuro-oncology, 2016. **18 Suppl 2**(Suppl 2): p. ii26-ii36.
40. Kirkham, J.J., et al., *Core Outcome Set-STAndards for Development: The COS-STAD recommendations*. PLoS Med, 2017. **14**(11): p. e1002447.
41. Williamson, P.R., et al., *The COMET Handbook: version 1.0*. Trials, 2017. **18**(Suppl 3): p. 280.
42. Kirkham, J.J., et al., *Core Outcome Set-STANDARDISED Protocol Items: the COS-STAP Statement*. Trials, 2019. **20**(1): p. 116.
43. Byrne A, S.S., Scott H, Nelson A, Seddon K, Calvert M, Retzer A, Grant R, Bulbeck H, Adams R, Watts C, Aiyegbusi OL, Kearns P, Cruz Rivera S. *Patient Reported Core Outcomes in Brain Tumour Trials: the COBra study*. 2020 [cited 2021 5 August].
44. Dirven, L., et al., *Working plan for the use of patient-reported outcome measures in adults with brain tumours: a Response Assessment in Neuro-Oncology (RANO) initiative*. Lancet Oncol, 2018. **19**(3): p. e173-e180.
45. INVOLVE. *UK Standards for Public Involvement: Better public involvement for better health and social care*. 2019 [cited 2021 4 August].

- 1
- 2
- 3 46. Staniszewska, S., et al., *GRIPP2 reporting checklists: tools to improve reporting of patient and*
- 4 *public involvement in research.* *Bmj*, 2017. **358**: p. j3453.
- 5
- 6 47. Thomas, J. and A. Harden, *Methods for the thematic synthesis of qualitative research in*
- 7 *systematic reviews.* *BMC Med Res Methodol*, 2008. **8**: p. 45.
- 8
- 9 48. Ltd, Q.I.P. *NVivo qualitative data analysis software.* 2020 [cited 2021 1 June].
- 10 49. Birmingham, U.o. *Tessa Jowell BRAIN MATRIX.* 2020 [cited 2021 5 August].
- 11 50. Saunders, B., et al., *Saturation in qualitative research: exploring its conceptualization and*
- 12 *operationalization.* *Qual Quant*, 2018. **52**(4): p. 1893-1907.
- 13 51. Braun, V. and V. Clarke, *Using thematic analysis in psychology.* *Qualitative Research in*
- 14 *Psychology*, 2006. **3**(2): p. 77-101.
- 15 52. Health, N.I.o. *Patient-Reported Outcomes Measurement Information System—PROMIS.* 2019
- 16 [cited 2021 29 January].
- 17 53. Guyatt, G.H., et al., *GRADE guidelines: 2. Framing the question and deciding on important*
- 18 *outcomes.* *J Clin Epidemiol*, 2011. **64**(4): p. 395-400.
- 19 54. Waters, A.M., et al., *The CONSENSUS study: protocol for a mixed methods study to establish*
- 20 *which outcomes should be included in a core outcome set for oropharyngeal cancer.* *Trials*,
- 21 2014. **15**: p. 168.
- 22 55. Fish, R., et al., *Core outcome research measures in anal cancer (CORMAC): protocol for*
- 23 *systematic review, qualitative interviews and Delphi survey to develop a core outcome set in*
- 24 *anal cancer.* *BMJ Open*, 2017. **7**(11): p. e018726.
- 25 56. Department for Digital, C., Media & Sport, Home Office. *Data Protection Act 2018.* 2018
- 26 [cited 2021 1 February].
- 27
- 28
- 29

### Author contribution

The study concept and design was conceived by AR, SS, HS, AN, HB, KS, RG, RA, CW, OLA, PK, SCR, LD, EB, MC, and AB. MC and AR advised on methodology. EB and AR will undertake the registry review, EB and SS will undertake the qualitative systematic review. EB and SS will recruit, screen and consent participants and will undertake the interviews with input from AR and AB. EB will recruit for the Delphi and consensus meeting, with input from SS, AR, and AB. HS prepared the first draft of the manuscript. AR prepared subsequent drafts. SS, HS, AN, HB, KS, RG, RA, CW, OLA, PK, SCR, LD, EB, MC, and AB all provided edits and critiqued the manuscript for intellectual content.

### Funding statement

This study is funded by The Brain Tumour Charity (GN-000704). The funders have no role in study design or manuscript preparation.

### Competing interests

Due to their involvement in the study design, the study team members will not participate in the Delphi process or consensus meeting, other than in a facilitative role. Study team members will encourage engagement and participation in the Delphi process and consensus meeting by individuals within the networks of which they are part, as appropriate. AR is partially funded by NIHR Applied Research Collaborative West Midlands. SS is supported by Marie Curie core grant funding to the Marie Curie Palliative Care Research Centre, Cardiff University, grant reference MCC-FCO-11-C. MC is Director of the Birmingham Health Partners Centre for Regulatory Science and Innovation, Director of the Centre for Patient Reported Outcomes Research and is a National Institute for Health Research (NIHR) Senior Investigator. She receives funding from the NIHR Birmingham Biomedical Research Centre, the NIHR Surgical Reconstruction and Microbiology Research Centre and NIHR ARC West Midlands at the at the University of Birmingham and University

1  
2  
3 Hospitals Birmingham NHS Foundation Trust, Health Data Research UK, Innovate UK (part of UK  
4 Research and Innovation), Macmillan Cancer Support, UCB and GSK Pharma. MC has received  
5 personal fees from Astellas, Takeda, Merck, Daiichi Sankyo, Glaukos, GSK, Aparito Ltd, CIS Oncology  
6 and the Patient-Centered Outcomes Research Institute (PCORI) outside the submitted work. MC has  
7 led the development of SPIRIT-PRO and CONSORT-PRO international guidance and is a member of  
8 the SISAQOL and PROTEUS Consortia. OLA receives funding from the NIHR Birmingham Biomedical  
9 Research Centre (BRC), NIHR Applied Research Centre (ARC), West Midlands at the University of  
10 Birmingham and University Hospitals Birmingham NHS Foundation, Innovate UK (part of UK  
11 Research and Innovation), Gilead Sciences Ltd, and Janssen Pharmaceuticals, Inc. OLA declares  
12 personal fees from Gilead Sciences Ltd, GlaxoSmithKline (GSK) and Merck outside the submitted  
13 work. LD has received research funding (as PI or collaborator) from the Brain Tumour Charity, EORTC  
14 Quality of Life Group, Innovative Medicines Initiatives, Dutch Cancer Society, ZonMw, National  
15 Institute for Health Research UK, and crowd funding initiatives, although not related to this specific  
16 research. LD is involved in the EORTC (as chair of the Brain Tumour Group Quality of Life Committee)  
17 and in the development of EORTC questionnaires for brain tumour patients (IADL, BN20). LD is a  
18 representative of the RANO PRO initiative. LD is associate Editor for Neuro Oncology, dealing with  
19 papers on clinical outcomes in brain tumours.  
20  
21  
22  
23  
24  
25  
26  
27  
28  
29  
30  
31  
32  
33  
34  
35  
36  
37  
38  
39  
40  
41  
42  
43  
44  
45  
46  
47  
48  
49  
50  
51  
52  
53  
54  
55  
56  
57  
58  
59  
60

peer review only

## Appendix 1

|                                                               |                                                                                                                                                                                                                                                                                       | Page    |
|---------------------------------------------------------------|---------------------------------------------------------------------------------------------------------------------------------------------------------------------------------------------------------------------------------------------------------------------------------------|---------|
| Title 1a                                                      | Identify in the title that the paper describes the protocol for the planned development of a COS                                                                                                                                                                                      | 1       |
| Abstract 1b                                                   | Provide a structured abstract                                                                                                                                                                                                                                                         | 2       |
| INTRODUCTION Background and objectives 2a                     | Describe the background and explain the rationale for developing the COS, and identify the reasons why a COS is needed and the potential barriers to its implementation                                                                                                               | 3-5, 11 |
| 2b                                                            | Describe the specific objectives with reference to developing a COS                                                                                                                                                                                                                   | 5       |
| Scope 3a                                                      | Describe the health condition(s) and population(s) that will be covered by the COS                                                                                                                                                                                                    | 5       |
| 3b                                                            | Describe the intervention(s) that will be covered by the COS                                                                                                                                                                                                                          | 5       |
| 3c                                                            | Describe the context of use for which the COS is to be applied                                                                                                                                                                                                                        | 5       |
| METHODS Stakeholders 4                                        | Describe the stakeholder groups to be involved in the COS development process, the nature of and rationale for their involvement and also how the individuals will be identified; this should cover involvement both as members of the research team and as participants in the study | 7-10    |
| Information sources 5a                                        | Describe the information sources that will be used to identify the list of outcomes. Outline the methods or reference other protocols/papers                                                                                                                                          | 6-10    |
| 5b                                                            | Describe how outcomes may be dropped/ combined, with reasons                                                                                                                                                                                                                          | 9-10    |
| Consensus process 6                                           | Describe the plans for how the consensus process will be undertaken                                                                                                                                                                                                                   | 10      |
| Consensus definition 7a                                       | Describe the consensus definition                                                                                                                                                                                                                                                     | 10      |
| 7b                                                            | Describe the procedure for determining how outcomes will be added/combined/dropped from consideration during the consensus process                                                                                                                                                    | 10      |
| ANALYSIS Outcome scoring/ feedback 8                          | Describe how outcomes will be scored and summarised, describe how participants will receive feedback during the consensus process                                                                                                                                                     | 10      |
| Missing data 9                                                | Describe how missing data will be handled during the consensus process                                                                                                                                                                                                                | 10      |
| ETHICS and DISSEMINATION Ethics approval/ informed consent 10 | Describe any plans for obtaining research ethics committee/institutional review board approval in relation to the consensus process and describe how informed consent will be obtained (if relevant)                                                                                  | 9-11    |
| Dissemination 11                                              | Describe any plans to communicate the results to study participants and COS users, inclusive of methods and timing of dissemination                                                                                                                                                   | 11      |
| ADMINISTRATIVE INFORMATION Funders 12                         | Describe sources of funding, role of funders                                                                                                                                                                                                                                          | 14      |
| Conflicts of interest 13                                      | Describe any potential conflicts of interest within the study team and how they will be managed                                                                                                                                                                                       | 14      |

1  
2  
3  
4  
5  
6  
7  
8  
9  
10  
11  
12  
13  
14  
15  
16  
17  
18  
19  
20  
21  
22  
23  
24  
25  
26  
27  
28  
29  
30  
31  
32  
33  
34  
35  
36  
37  
38  
39  
40  
41  
42  
43  
44  
45  
46  
47  
48  
49  
50  
51  
52  
53  
54  
55  
56  
57  
58  
59  
60

For peer review only



## Appendix 2

## 1. ClinicalTrials.gov

Condition/Disease: glioma OR astrocytoma OR oligodendroglioma OR oligoastrocytoma OR ependymoma OR astroblastoma OR anaplastic ganglioglioma OR glioblastoma OR GBM OR Glioblastoma multiforme

Study type: Interventional Studies (Clinical Trials)

Age: Adult 18-64 AND Older Adult (65+)

Phase: III

## 2. ISRCTN.com

Each term searched individually:

Condition/Disease: glioma; astrocytoma; oligodendroglioma; oligoastrocytoma; ependymoma; astroblastoma; anaplastic ganglioglioma; glioblastoma; GBM; Glioblastoma multiforme

peer review only
