# Supplementary material for: Development of a core outcome set and identification of patient-reportable outcomes for primary brain tumour trials: protocol for the COBra study
Source: PubMed Central journal article supplement (PMC9528585; doi:10.1136/bmjopen-2021-057712), 2022-09-30
Supplement: bmjopen-2021-057712supp001.pdf [file bmjopen-2021-057712supp001.pdf]

## Appendix 1

|                                                               |                                                                                                                                                                                                                                                                                       | Page    |
|---------------------------------------------------------------|---------------------------------------------------------------------------------------------------------------------------------------------------------------------------------------------------------------------------------------------------------------------------------------|---------|
| Title 1a                                                      | Identify in the title that the paper describes the protocol for the planned development of a COS                                                                                                                                                                                      | 1       |
| Abstract 1b                                                   | Provide a structured abstract                                                                                                                                                                                                                                                         | 2       |
| INTRODUCTION Background and objectives 2a                     | Describe the background and explain the rationale for developing the COS, and identify the reasons why a COS is needed and the potential barriers to its implementation                                                                                                               | 3-5, 11 |
| 2b                                                            | Describe the specific objectives with reference to developing a COS                                                                                                                                                                                                                   | 5       |
| Scope 3a                                                      | Describe the health condition(s) and population(s) that will be covered by the COS                                                                                                                                                                                                    | 5       |
| 3b                                                            | Describe the intervention(s) that will be covered by the COS                                                                                                                                                                                                                          | 5       |
| 3c                                                            | Describe the context of use for which the COS is to be applied                                                                                                                                                                                                                        | 5       |
| METHODS Stakeholders 4                                        | Describe the stakeholder groups to be involved in the COS development process, the nature of and rationale for their involvement and also how the individuals will be identified; this should cover involvement both as members of the research team and as participants in the study | 7-10    |
| Information sources 5a                                        | Describe the information sources that will be used to identify the list of outcomes. Outline the methods or reference other protocols/papers                                                                                                                                          | 6-10    |
| 5b                                                            | Describe how outcomes may be dropped/ combined, with reasons                                                                                                                                                                                                                          | 9-10    |
| Consensus process 6                                           | Describe the plans for how the consensus process will be undertaken                                                                                                                                                                                                                   | 10      |
| Consensus definition 7a                                       | Describe the consensus definition                                                                                                                                                                                                                                                     | 10      |
| 7b                                                            | Describe the procedure for determining how outcomes will be added/combined/dropped from consideration during the consensus process                                                                                                                                                    | 10      |
| ANALYSIS Outcome scoring/ feedback 8                          | Describe how outcomes will be scored and summarised, describe how participants will receive feedback during the consensus process                                                                                                                                                     | 10      |
| Missing data 9                                                | Describe how missing data will be handled during the consensus process                                                                                                                                                                                                                | 10      |
| ETHICS and DISSEMINATION Ethics approval/ informed consent 10 | Describe any plans for obtaining research ethics committee/institutional review board approval in relation to the consensus process and describe how informed consent will be obtained (if relevant)                                                                                  | 9-11    |
| Dissemination 11                                              | Describe any plans to communicate the results to study participants and COS users, inclusive of methods and timing of dissemination                                                                                                                                                   | 11      |
| ADMINISTRATIVE INFORMATION Funders 12                         | Describe sources of funding, role of funders                                                                                                                                                                                                                                          | 14      |
| Conflicts of interest 13                                      | Describe any potential conflicts of interest within the study team and how they will be managed                                                                                                                                                                                       | 14      |
