# Supplementary material for: Development of a core outcome set and identification of patient-reportable outcomes for primary brain tumour trials: protocol for the COBra study
Source: PubMed Central journal article supplement (PMC9528585; doi:10.1136/bmjopen-2021-057712), 2022-09-30
Supplement: bmjopen-2021-057712supp002.pdf [file bmjopen-2021-057712supp002.pdf]

## Appendix 2

### 1. ClinicalTrials.gov

Condition/Disease: glioma OR astrocytoma OR oligodendroglioma OR oligoastrocytoma OR ependymoma OR astroblastoma OR anaplastic ganglioglioma OR glioblastoma OR GBM OR Glioblastoma multiforme

Study type: Interventional Studies (Clinical Trials)

Age: Adult 18-64 AND Older Adult (65+)

Phase: III

### 2. ISRCTN.com

Each term searched individually:

Condition/Disease: glioma; astrocytoma; oligodendroglioma; oligoastrocytoma; ependymoma; astroblastoma; anaplastic ganglioglioma; glioblastoma; GBM; Glioblastoma multiforme
